# Supplementary material
Source: ML conference proceedings conference paper supplement (https://proceedings.neurips.cc/paper_files/paper/2020/hash/dabd8d2ce74e782c65a973ef76fd540b-Abstract.html)
Supplement: Supplementary file [file dabd8d2ce74e782c65a973ef76fd540b-Supplemental.pdf]

---

# Content Provider Dynamics and Coordination in Recommendation Ecosystems

---

**Omer Ben-Porat**

Technion  
Haifa 32000 Israel  
omerbp@campus.technion.ac.il

**Itay Rosenberg**

Technion  
Haifa 32000 Israel  
itayrose@campus.technion.ac.il

**Moshe Tennenholtz**

Technion  
Haifa 32000 Israel  
moshet@ie.technion.ac.il

## Abstract

Recommendation Systems like YouTube are vibrant ecosystems with two types of users: Content consumers (those who watch videos) and content providers (those who create videos). While the computational task of recommending relevant content is largely solved, designing a system that guarantees high social welfare for *all* stakeholders is still in its infancy. In this work, we investigate the dynamics of content creation using a game-theoretic lens. Employing a stylized model that was recently suggested by other works, we show that the dynamics will always converge to a pure Nash Equilibrium (PNE), but the convergence rate can be exponential. We complement the analysis by proposing an efficient PNE computation algorithm via a combinatorial optimization problem that is of independent interest.

## 1 Introduction

Recommendation systems (RSs hereinafter) play a major role in our life nowadays. Many modern RSs, like YouTube, Medium, or Spotify, recommend content created by others and go far beyond recommendations. They are vibrant ecosystems with *multiple stakeholders* and are responsible for the well-being of all of them. For example, in the online publishing platform Medium, the platform should be profitable; suggest relevant content to the content consumers (readers); and support the content providers (authors). In light of this ecosystem approach, research on RSs has shifted from determining consumers' taste (e.g., the Netflix Prize challenge [10, 28]) to other aspects like fairness, ethics, and long-term welfare [6, 32, 34, 38, 40, 44–46, 48].

Understanding content providers and their utility<sup>1</sup> is still in its infancy. Content providers produce a constant supply of content (e.g., articles in Medium, videos on YouTube), and are hence indispensable. Successful content providers rely on the RS for some part of their income: Advertising, affiliated marketing, sponsorship, and merchandise; thus, unsatisfied content providers might decide to provide a different type of content or even abandon the RS. To illustrate, a content provider who is unsatisfied with her exposure, which is heavily correlated with her income from the RS, can switch to another type of content or seek another niche. Such downstream effects are detrimental to content consumer satisfaction because they *change the available content* the RS can recommend. The synergy between content providers and consumers is thus fragile, and solidifying one side solidifies the other.

---

<sup>1</sup>We use the term *utility* to address the well-being of the content providers, and *social welfare* for the well-being of the content consumers.

In this paper, we investigate the *dynamics* of RSs using a stylized model in which content providers are strategic. Content providers obtain utility from displays of their content and are willing to change the content they offer to increase their utility. These fluctuations change not only the utility of the providers but also the social welfare of the consumers, defined as the quality of their proposed content. We show that the provider dynamics always converges to a stable point (namely, a pure Nash equilibrium), but the convergence time may be long. This observation suggests a more centralized approach, in which the RS coordinates the providers, and leads to fast convergence.

While our model is stylized, we believe it offers insights into more general, real-world RSs. The game-theoretic modeling allows counterfactual reasoning about the content that could-have-been-generated, which is impossible to achieve using existing data-sets and small online experiments. Our analysis advocates increased awareness to content providers and their incentives, a behavior that rarely exists these days in RSs.<sup>2</sup>

**Our contribution** We explore the ecosystem using the following game-theoretic model, and use the blogging terminology to simplify the discussion. We consider a set of players (i.e., content providers), each selects a topic to write from a predefined set of topics (e.g., economics, sports, medieval movies, etc.). Each player has a *quality* w.r.t. each topic, quantifying relevance and attractiveness of that author’s content if she writes on that topic, and a *conversion rate*. Given a selection of topics (namely, a strategy profile), the RS serves users who consume content. All queries concerned with a topic are modeled as the demand for that topic. The utility every player obtains is the sum of displays her content receives (affected by the demand for topics and the operating RS) multiplied by the conversion rate. The game-theoretic model we adopt in service is suggested by Ben Basat et al. [5] and is well-justified by later research [9, 46].

Technically, we deal with the question of reaching a stable point—a point in which none of the players can deviate from her selected topic and increase her utility. We are interested in the convergence time and the welfare of the system in these stable points. We first explore the decentralized approach: Better-response learning dynamics (see, e.g., [18, 23]), in which players asynchronously deviate to improve their utility (an arbitrary player to an arbitrary strategy, as long as she improves upon her current utility). We show that every better-response dynamic converges, thereby extending prior work [9]. Through a careful recursive construction, we show a negative result: The convergence time can be exponential in the number of topics. Long convergence time suggests a different approach. We consider the scenario in which the RS could act centrally, and support the process of *matching* players with topics. We devise an algorithm that computes an equilibrium fast (roughly squared in the input size). To solve this computational challenge, which is a mixture of matching and load-balancing, we propose a novel combinatorial optimization problem that is of independent interest.

Conceptually, we offer a qualitative grounding for the advantages of coordination and intervention<sup>3</sup> in the content provider dynamics. Our analysis relies on the assumption of complete knowledge of all model parameters, in particular the qualities. While unrealistic in practice, we expect that incomplete information will only exacerbate the problems we address. The main takeaway from this paper is that RSs are not self-regulated markets, and as much as suggesting authors topics to write on can lead to a significant increase in the system’s stability. We discuss some practical ways of reaching this goal in Section 5.

**Related work** Strikingly, content provider welfare and their fair treatment were only suggested very recently in the Recommendation Systems and Information Retrieval communities [13, 15, 20, 38, 44, 50]. All of these works do not model the incentives of content providers explicitly, and consequently cannot offer a what-if analysis like ours.

Our model is similar to those employed in several recent papers [5, 6, 8, 9, 33]. Ben-Porat et al. [9] study a model that is a special case of ours, and show that every learning dynamic converges. Our Theorem 1 recovers and extends their convergence results. Moreover, unlike this work, they do not address convergence time, social welfare, and centralized equilibrium computation. Other works [6, 8, 33] aim to design recommendation mechanisms that mitigate strategic behavior and

---

<sup>2</sup>There are some exceptions, e.g., YouTube instructing providers how to find their niche [1]. However, these are sporadic, primitive, and certainly do not enjoy recent technological advancements like collaborative filtering.

<sup>3</sup>We do not say that the RSs should dictate authors what to write; instead, it should suggest to each author profitable topics that he/she can write on competently to increase her utility.

lead to long-term welfare. On the negative side, their mechanisms might knowingly recommend inferior content to some consumers. We see their work as parallel to ours, as in this work we focus on the prevailing recommendation approach—recommending the best-fitting content. We suggest that a centralized approach, in which the RS orchestrates the player-topic matching, can significantly improve the time until the system reaches stability (in the form of equilibrium). Furthermore, we envision that our approach can also lead to high social welfare, as we discuss in Section 5.

More broadly, an ever-growing body of research deals with fairness considerations in Machine Learning [16, 19, 39, 41, 49]. In the context of RSs, a related line of research suggests fairer ranking methods to improve the overall performance [12, 29, 47]. For example, Yao and Huang [47] propose metrics mitigating discrimination in collaborative-filtering methods that arise from learning from historical data. Despite not always being explicit, the ultimate goal of fairness imposition is to achieve long-term welfare [31]. Our paper and analysis share a similar flavor: To achieve high stability via faster convergence, RSs should coordinate the process of content selection.

## 2 Model

We consider the following recommendation ecosystem, where for concreteness we continue with the blog authors<sup>4</sup> example. There is a set of authors  $\mathcal{P}$ , each owning a blog. We further assume that each blog is concerned with a single topic, from a predefined topic set  $\mathcal{T}$ . We assume  $\mathcal{P}$  and  $\mathcal{T}$  are finite, and denote  $|\mathcal{P}| = P$  and  $|\mathcal{T}| = T$ . The strategy space of each player is thus  $\mathcal{T}$ ; she selects the topic she writes on. A pure strategy profile is a tuple  $\mathbf{a} = (a_1, \dots, a_P)$  of topic selections, where  $a_j$  is the topic selected by author  $j$ .

For every author  $j$  and topic  $k$ , there is a *quality* that quantifies the relevance and attractiveness of  $j$ 's blog if she picks the topic  $k$ . We denote by  $\mathcal{Q}$  the quality matrix, for  $\mathcal{Q} \in [0, 1]^{P \times T}$ . The RS serves users who consume content. We do not distinguish individual consumers, but rather model the need for content as a demand for each topic. A demand distribution  $\mathcal{D}$  over the topics  $\mathcal{T}$  is publicly known, where we use  $\mathcal{D}(k)$  to denote the demand mass for topic  $k \in \mathcal{T}$ . W.l.o.g., we assume that  $\mathcal{D}(1) \geq \mathcal{D}(2) \geq \dots \geq \mathcal{D}(m)$ .

The recommendation function  $\mathcal{R}$  matches demand with available blogs. Given the demand for topic  $k$ , a strategy profile  $\mathbf{a}$ , and the quality  $\mathcal{Q}$  of the blogs for the selected topics in  $\mathbf{a}$ , the recommendation function  $\mathcal{R}$  recommends content, possibly in a randomized manner. It is well-known that content consumers pay most of their attention to highly ranked content [14, 24, 27, 30]; therefore, we assume for simplicity that  $\mathcal{R}$  recommends one content solely. For ease of notation, we denote  $\mathcal{R}_j(\mathcal{Q}, k, \mathbf{a})$  as the probability that author  $j$  is ranked first under the distribution  $\mathcal{R}(\mathcal{Q}, k, \mathbf{a})$  (or rather, author  $j$ 's content is ranked first). While blog readers admire high-quality recommended blogs, blog authors care for payoffs. As described in Section 1, authors draw monetary rewards from attracting readers in various ways. We model this payoff abstractly using a *conversion matrix*  $\mathcal{C}, \mathcal{C} \in [0, 1]^{P \times T}$ . We assume that every blog reader grants  $\mathcal{C}_{j,k}$  monetary units to author  $j$  when she writes on topic  $k$ . For example, if author  $j$  only cares for exposure, namely the number of impressions her blog receives, then  $\mathcal{C}_{j,k} = 1$  for every  $k \in \mathcal{T}$ . Alternatively, if author  $j$  cares for the engagement of readers in her blog, then the conversion  $\mathcal{C}_{j,k}$  should be somewhat correlated with the quality  $\mathcal{Q}_{j,k}$ . We will return to these two special cases later on, in Subsection 3.1. The *utility* of author  $j$  under a strategy profile  $\mathbf{a}$  is given by

$$\mathcal{U}_j(\mathbf{a}) \stackrel{\text{def}}{=} \sum_{k \in \mathcal{T}} \mathbb{1}_{a_j=k} \cdot \mathcal{D}(k) \cdot \mathcal{R}_j(\mathcal{Q}, k, \mathbf{a}) \cdot \mathcal{C}_{j,k}. \quad (1)$$

Overall, we represent a game as a tuple  $\langle \mathcal{P}, \mathcal{T}, \mathcal{D}, \mathcal{Q}, \mathcal{C}, \mathcal{R}, \mathcal{U} \rangle$ , where  $\mathcal{P}$  is the authors,  $\mathcal{T}$  is the topics,  $\mathcal{D}$  is the demand for topics,  $\mathcal{Q}$  and  $\mathcal{C}$  are the quality and conversion matrices,  $\mathcal{R}$  is the recommendation function, and  $\mathcal{U}$  is the utility function.

**Recommending the Highest Quality Content** In this paper, we focus on the RS that recommends blogs of the highest quality, breaking ties randomly. Such a behavior is intuitive and well-justified in the literature [4, 11, 26, 42]. More formally, let  $B_k(\mathbf{a})$  denote the highest quality of a blog written on topic  $k$  under the profile  $\mathbf{a}$ , i.e.,  $B_k(\mathbf{a}) \stackrel{\text{def}}{=} \max_{j \in \mathcal{P}} \{\mathbb{1}_{a_j=k} \cdot \mathcal{Q}_{j,k}\}$ . Furthermore, let  $H_k(\mathbf{a})$  denote the set of authors whose documents have the highest quality among those who write on topic  $k$  under

<sup>4</sup>We use authors and players interchangeably.

$\mathbf{a}$ ,  $H_k(\mathbf{a}) \stackrel{\text{def}}{=} \{j \in \mathcal{P} \mid \mathbb{1}_{a_j=k} \cdot \mathcal{Q}_{j,k} = B_k(\mathbf{a})\}$ . The recommendation function  $\mathcal{R}^{\text{top}}$  is therefore defined as

$$\mathcal{R}_j^{\text{top}}(\mathcal{Q}, k, \mathbf{a}) \stackrel{\text{def}}{=} \begin{cases} \frac{1}{|H_k(\mathbf{a})|} & j \in H_k(\mathbf{a}) \\ 0 & \text{otherwise} \end{cases}.$$

Consequently, we can reformulate the utility function from Equation (1) in the following succinct form,<sup>5</sup>

$$\mathcal{U}_j(\mathbf{a}) \stackrel{\text{def}}{=} \sum_{k \in \mathcal{T}} \mathbb{1}_{a_j=k} \cdot \frac{\mathcal{D}(k)}{|H_k(\mathbf{a})|} \cdot \mathcal{C}_{j,k}. \quad (2)$$

From here on, since  $\mathcal{R}^{\text{top}}$  and  $\mathcal{U}$  are fully determined by the rest of the objects, we omit them from the game representation; hence, we represent every game by the more concise tuple  $\langle \mathcal{P}, \mathcal{T}, \mathcal{D}, \mathcal{Q}, \mathcal{C} \rangle$ .

**Quality-Conversion Assumption** Throughout the paper, we make the following Assumption 1 about the relation between quality and conversion.

**Assumption 1.** For every topic  $k \in \mathcal{T}$  and every two authors  $j_1, j_2 \in \mathcal{P}$ ,

$$\mathcal{Q}_{j_1,k} \geq \mathcal{Q}_{j_2,k} \Rightarrow \mathcal{C}_{j_1,k} \geq \mathcal{C}_{j_2,k}.$$

Intuitively, Assumption 1 implies that quality and conversion are correlated given the topic. For every topic  $k$ , if authors  $j_1$  and  $j_2$  write on topic  $k$  and  $j_1$ 's content has a weakly better quality, then  $j_1$ 's content has also a weakly better conversion. This assumption plays a crucial role in our analysis; we discuss relaxing it in Section 5.

**Solution Concepts** The social welfare of the readers is the average weighted quality. Formally, given a strategy profile  $\mathbf{a}$ ,

$$SW(\mathbf{a}) \stackrel{\text{def}}{=} \sum_{k \in \mathcal{T}} \mathcal{D}(k) \sum_{j \in \mathcal{P}} \mathcal{R}_j(\mathcal{Q}, k, \mathbf{a}) \mathcal{Q}_{j,k}. \quad (3)$$

As the recommendation function  $\mathcal{R}^{\text{top}}$  always recommends the highest quality content, we can have the following more succinct representation of social welfare,  $SW(\mathbf{a}) = \sum_{k \in \mathcal{T}} \mathcal{D}(k) B_k(\mathbf{a})$ . However, social welfare maximization does not concern author utility. Authors may be willing to deviate from the socially optimal profile if such a deviation is beneficial in terms of utility. Consequently, we seek stable solutions, as captured by the property of pure Nash equilibrium (hereinafter PNE). We say that a strategy profile  $\mathbf{a}$  is a PNE if for every author  $j$  and topic  $k$ ,  $\mathcal{U}_j(\mathbf{a}) \geq \mathcal{U}_j(\mathbf{a}_{-j}, k)$ , where  $\mathbf{a}_{-j}$  is the tuple obtained by deleting the  $j$ 's entry of  $\mathbf{a}$ . It is worth noting that while mixed Nash equilibrium is guaranteed to exist in finite games, a PNE generally does not exist in games. However, as we show later on, it always exists in our class of games.

**Example** To clarify our notation and setting, we provide the following example. Consider a game with two players ( $P = 2$ ), two topics ( $T = 2$ ) and the demand distribution  $\mathcal{D}$  such that  $\mathcal{D}(1) = 3/5$ ,  $\mathcal{D}(2) = 2/5$ . Let the quality and conversion matrices be

$$\mathcal{Q} = \begin{pmatrix} 1 & 1/3 \\ 2/3 & 1/3 \end{pmatrix}, \quad \mathcal{C} = \begin{pmatrix} 1/3 & 1 \\ 1/5 & 1 \end{pmatrix}.$$

Consider the strategy profile  $(a_1, a_2) = (1, 1)$ . Author 1 is more competent than author 2 on topic 1, since  $\mathcal{Q}_{1,1} = 1 > \mathcal{Q}_{2,1} = 2/3$ ; thus, the utility of author 1 under the profile  $(1, 1)$  is  $\mathcal{U}_1(1, 1) = \mathcal{D}(1) \cdot \mathcal{R}_1^{\text{top}}(\mathcal{Q}, 1, (1, 1)) \cdot \mathcal{C}_{1,1} = \frac{3}{5} \cdot 1 \cdot \frac{1}{3} = \frac{1}{5}$ . On the other hand, author 2 gets  $\mathcal{U}_2(1, 1) = \frac{3}{5} \cdot 0 \cdot \frac{1}{5} = 0$ . Author 2 has a beneficial deviation: Under the profile  $(1, 2)$ , her utility is  $\mathcal{U}_2(1, 2) = \frac{2}{5} \cdot 1 \cdot 1 = \frac{2}{5}$ , while the utility of author 1 remains the same,  $\mathcal{U}_1(1, 2) = \frac{1}{5}$ . For the strategy profile  $(2, 2)$ , both authors have the same quality; thus,  $\mathcal{R}_1^{\text{top}}(\mathcal{Q}, 2, (2, 2)) = \mathcal{R}_2^{\text{top}}(\mathcal{Q}, 2, (2, 2)) = \frac{1}{2}$ . As for the utilities,  $\mathcal{U}_1(2, 2) = \mathcal{U}_2(2, 2) = \frac{2}{5} \cdot \frac{1}{2} \cdot 1 = \frac{1}{5}$ . Overall, we see that both  $(1, 2)$  and  $(2, 2)$  are PNEs, since the authors do not have beneficial deviations. However, the social welfare of these PNEs is different:  $SW(1, 2) = \frac{3}{5} \cdot 1 + \frac{2}{5} \cdot \frac{1}{3} \approx 0.73$ , yet  $SW(2, 2) = \frac{3}{5} \cdot 0 + \frac{2}{5} \cdot \frac{1}{3} \approx 0.13$ .

<sup>5</sup>In case no author writes on topic  $k$  under  $\mathbf{a}$ ,  $\mathcal{R}$  do not make any recommendation. As reflected in the utility function  $\mathcal{U}$  through the indicator  $\mathbb{1}_{a_j=k}$ , readers associated with a non-selected topic  $k$  do not contribute to any author's utility.

### 3 Decentralized Approach

In this section, we consider the prevailing, decentralized approach. Starting from an arbitrary profile, authors interact asynchronously, each improving her utility in every time step. Such dynamics is widely-known in the Game Theory literature as better-response dynamics (hereinafter, BRDs). Studying BRDs is a robust approach for assuring the environment reaches a stable point, while making minimal assumption on the information of the players. Two central questions about BRDs in games are a) whether *any* BRD converges; and b) what is the convergence rate. We show that the answer to the first question is in the affirmative. For the second question, we show through an intricate combinatorial construction a result of negative flavor: The convergence rate can be exponential in the number of topics  $T$ .

#### 3.1 Better-Response Dynamic Convergence

Before we go on, we define BRDs formally. Given a strategy profile  $\mathbf{a}$ , we say that  $a'_j \in \mathcal{T}$  is a *better response* of author  $j$  w.r.t.  $\mathbf{a}$  if  $\mathcal{U}_j(\mathbf{a}_{-j}, a'_j) > \mathcal{U}_j(\mathbf{a})$ . A BRD is a sequence of profiles  $(\mathbf{a}^1, \mathbf{a}^2, \dots)$ , where at every step  $i + 1$  exactly one author better-responds to  $\mathbf{a}^i$ , i.e., there exists an author  $j(i)$  such that  $\mathbf{a}^{i+1} = (\mathbf{a}_{-j(i)}^i, a_{j(i)}^{i+1})$  and  $\mathcal{U}_{j(i)}(\mathbf{a}^{i+1}) > \mathcal{U}_{j(i)}(\mathbf{a}^i)$ . A BRD can start from any arbitrary profile, and include improvements of any arbitrary author at any arbitrary step (assuming she has a better response in that time step). If a BRD  $\mathbf{a}^1, \dots, \mathbf{a}^l$  converges, namely no player can better respond to  $\mathbf{a}^l$ , then by definition  $\mathbf{a}^l$  is a PNE.

Our goal is to show that every BRD of any game in our class of games converges. If there exists an infinite BRD, then it must contain cycles as the number of different strategy profiles is finite. Equivalently, nonexistence of improvement cycles suggests that any BRD will converge to a PNE [35]. General techniques for showing BRD convergence in games are rare, and are typically based on coming up with a potential function [7, 23, 37] or a natural lexicographic order [2, 21]. However, as already established by prior work [9, Proposition 1], our class of game does not fit into the category of an exact potential function; and a lexicographic order does not seem to arise naturally. Ben-Porat et al. [9] prove BRD convergence for two sub-classes of games: Games where  $\mathcal{C}$  is identically 1, and games with  $\mathcal{C} = \mathcal{Q}$ . Interestingly, they prove BRD convergence for each sub-class separately using different arguments. We extend their technique to deal with any conversion matrix  $\mathcal{C}$  that satisfies Assumption 1.

**Theorem 1.** *If a game  $\mathcal{G}$  satisfies Assumption 1, then every BRD in  $\mathcal{G}$  converges to a PNE.*

#### 3.2 Rate of Convergence

We now move on to the second question proposed in the beginning of the section, which deals with convergence rate. The convergence rate is the worst-case length of any BRD. Recall that a BRD can start from a PNE and thus converge after one step, and hence the worst-case approach we offer here is justified.

Our next theorem lower bounds the worst case convergence rate by an exponential factor in the number of topics  $T$ . This result is illuminating as it shows that in the worst case, although convergence is guaranteed, it may not be reachable in feasible time.

**Theorem 2.** *Consider  $P \geq 1$  and  $T \geq 2$ . There exist games satisfying Assumption 1 with  $|\mathcal{P}| = P$  and  $|\mathcal{T}| = T$ , in which there are BRDs with at least  $(\frac{T-2}{P} + 1)^P$  steps.*

**Proof sketch of Theorem 2.** The proof relies on a recursive construction. We construct a game and an improvement path with at least the length specified in the theorem. To balance rigor and intuition, we present here a special case of our general construction and defer the formal proof to the appendix.

Consider the game with  $P = 3, T = 5, \mathcal{D}(k) = \frac{1}{5}$  for every  $k \in \mathcal{T}$  and

$$\mathcal{Q} = \mathcal{C} = \begin{pmatrix} c & \boxed{2c} & \boxed{3c} & \boxed{4c} & \boxed{5c} \\ c & \boxed{9c} & \boxed{8c} & \boxed{7c} & \boxed{6c} \\ c & \boxed{10c} & \boxed{11c} & \boxed{12c} & \boxed{13c} \end{pmatrix}$$

$$\begin{array}{l}
\mathbf{a}^1 = (2, 1, 1) \quad \mathbf{a}^2 = (3, 1, 1) \quad \mathbf{a}^3 = (4, 1, 1) \quad \mathbf{a}^4 = (5, 1, 1) \quad \mathbf{a}^5 = (5, 5, 1) \quad \mathbf{a}^6 = (1, 5, 1) \\
\mathbf{a}^7 = (2, 5, 1) \quad \mathbf{a}^8 = (3, 5, 1) \quad \mathbf{a}^9 = (4, 5, 1) \quad \mathbf{a}^{10} = (4, 4, 1) \quad \mathbf{a}^{11} = (1, 4, 1) \quad \mathbf{a}^{12} = (2, 4, 1) \\
\mathbf{a}^{13} = (3, 4, 1) \quad \mathbf{a}^{14} = (3, 3, 1) \quad \mathbf{a}^{15} = (1, 3, 1) \quad \mathbf{a}^{16} = (2, 3, 1) \quad \mathbf{a}^{17} = (2, 2, 1) \quad \mathbf{a}^{18} = (1, 2, 1) \\
\mathbf{a}^{19} = (1, 2, 2) \quad \mathbf{a}^{20} = (1, 1, 2) \quad \mathbf{a}^{21} = (3, 1, 2) \quad \mathbf{a}^{22} = (4, 1, 2) \quad \mathbf{a}^{23} = (5, 1, 2) \quad \mathbf{a}^{24} = (5, 5, 2) \\
\mathbf{a}^{25} = (1, 5, 2) \quad \mathbf{a}^{26} = (3, 5, 2) \quad \mathbf{a}^{27} = (4, 5, 2) \quad \mathbf{a}^{28} = (4, 4, 2) \quad \mathbf{a}^{29} = (1, 4, 2) \quad \mathbf{a}^{30} = (3, 4, 2) \\
\mathbf{a}^{31} = (3, 3, 2) \quad \mathbf{a}^{32} = (1, 3, 2) \quad \mathbf{a}^{33} = (1, 3, 3) \quad \mathbf{a}^{34} = (1, 1, 3) \quad \mathbf{a}^{35} = (4, 1, 3) \quad \mathbf{a}^{36} = (5, 1, 3) \\
\mathbf{a}^{37} = (5, 5, 3) \quad \mathbf{a}^{38} = (1, 5, 3) \quad \mathbf{a}^{39} = (4, 5, 3) \quad \mathbf{a}^{40} = (4, 4, 3) \quad \mathbf{a}^{41} = (1, 4, 3) \quad \mathbf{a}^{42} = (1, 4, 4) \\
\mathbf{a}^{43} = (1, 1, 4) \quad \mathbf{a}^{44} = (5, 1, 4) \quad \mathbf{a}^{45} = (5, 5, 4) \quad \mathbf{a}^{46} = (1, 5, 4) \quad \mathbf{a}^{47} = (1, 5, 5) \quad \mathbf{a}^{48} = (1, 1, 5)
\end{array}$$

Figure 1: A long improvement path for the instance in the proof sketch of Theorem 2.

for  $c = \frac{1}{PT}$ . The first column of the matrix, which is associated with the quality of topic 1, is identical for all authors. The snake-shape path in the matrix is always greater than the value  $c$  in the first column, and is monotonically increasing (top-down). The immediate implications are a) odd players improve their quality when deviating to a topic with a greater index, while even players improve their quality when deviating to a topic with a smaller index (which is not topic 1); and b) every player is more competent than all the players that precede her on every topic but topic 1. The initial profile is  $\mathbf{a}^0 = (1, 1, \dots, 1)$ . We construct the BRD that appears in Figure 1.<sup>6</sup> It comprises three types of steps: Purple, green and yellow. In purple steps, author 1 deviates to a topic with a higher index. In yellow steps, author 2 deviates to the topic selected by author 1 (e.g., in  $\mathbf{a}^5$ ) or author 3 deviates to the topic selected by author 2 (e.g., in  $\mathbf{a}^{19}$ ). Green steps always follow yellow steps. In green steps, the author whose topic was selected in the previous step by an author with a higher index deviates back to topic 1 (e.g., author 1 in  $\mathbf{a}^6$  after author 2 selects topic 5 in  $\mathbf{a}^5$ , or author 2 in  $\mathbf{a}^{20}$  after author 3 selects topic 2 in  $\mathbf{a}^{19}$ ).

In steps  $\mathbf{a}^1 - \mathbf{a}^4$ , only author 1 deviates (purple steps). This is also the recursive path in a game with author 1 solely (disregarding the entries of the other players). Then, in  $\mathbf{a}^5$ , author 2 deviates to topic 5 (yellow). Since author 2 is more competent than author 1 in every topic (excluding topic 1), author 1's utility equals zero. Then, author 1 deviates to back topic 1 in  $\mathbf{a}^6$  (green). This goes on until step  $\mathbf{a}^{18}$ —author 1 improves, author 2 ties, and author 1 returns to topic 1. Steps  $\mathbf{a}^1 - \mathbf{a}^{18}$  comprise the recursive path for two players. Until step  $\mathbf{a}^{18}$ , author 3 did not move. Then, in step  $\mathbf{a}^{19}$ , author 3 deviates to topic 2. Author 3 is more competent than author 2, so in  $\mathbf{a}^{20}$  author 2 returns to topic 1. In steps  $\mathbf{a}^{21} - \mathbf{a}^{32}$  authors 1 and 2 follow the same logic as before, but they overlook topic 2 (since author 3, who is more competent than both of them, selects it). In steps  $\mathbf{a}^{33} - \mathbf{a}^{34}$  author 3 deviates to topic 3, and then author 2 returns to topic 1. In steps  $\mathbf{a}^{35} - \mathbf{a}^{41}$  authors 1 and 2 follow the same logic as before, but they overlook both topics 2 and 3. The path continues similarly until we reach the profile  $\mathbf{a}^{48}$ . Notice that the latter profile is not an equilibrium, but we end the path at this point for the sake of the analysis. This path is indeed exponential—for every step author  $i$  makes, for  $1 < i \leq 3$ , author  $i - 1$  makes at least twice as many (in fact, much more than that; see the formal proof for more details).  $\square$

Theorem 2 implies that there are BRDs of length  $\left(\frac{T-2}{P} + 1\right)^P$ , which is  $O(\exp(T))$  for large enough  $P$ . Furthermore, if the number of topics  $T$  and the authors  $P$  are in the same order of magnitude, then length is also exponential in  $P$ .

## 4 Centralized Approach - Equilibrium Computation

To remedy the long convergence rate, in this section we propose an efficient algorithm for PNE computation. The algorithm is a matching application and relies on a novel graph-theoretic notion. To motivate the matching perspective, we reconsider social welfare (see Equation (3)) and neglect strategic aspects momentarily. We can find a social welfare-maximizing profile using the following matching reduction. We construct a bipartite graph, one side being the authors and the other side being the topics. The weight on each edge  $(j, k)$  is  $Q_{j,k} \mathcal{D}(k)$ , the quality author  $j$  has on topic  $k$  times the user mass on that topic. Notice that every author can only select one strategy (topic). Furthermore, for the purpose of social welfare maximization, it suffices to consider candidate profiles in which every topic is selected by at most one author. Consequently, a maximum weighted matching

<sup>6</sup>An accessible version of Figure 1 appears in Figure 4.

of this graph corresponds to the social welfare maximizer. By using, e.g., the Hungarian algorithm, the problem of finding a social welfare-maximizing profile can be solved in  $O(\max\{P, T\}^3)$ .

However, equilibrium profiles and social welfare-maximizing profiles typically do not coincide (see the celebrated work on the Price of Anarchy [36]). The maximum matching that we proposed in the previous paragraph is susceptible to beneficial deviations; therefore, it is not stable in the equilibrium sense.<sup>7</sup> There exist many variants of stable matching in the literature, but virtually none fit the equilibrium stability we seek. In particular, the deferred acceptance algorithm [22] cannot be used since several players can select the same topic and thus the matching is not one-to-one. If we create several copies of the same topic (a common practice for the deferred acceptance algorithm), high-quality players would block low-quality authors matched to it (unlike several medical students with varying qualities that are matched to the same hospital). In the remainder of this section, we propose a sequential matching technique to compute a PNE. Our approach contributes to the matching literature and is based on the definition of *saturated sets*.

Due to our extensive use of graph theory in what follows, we introduce a few notational conventions. We denote a graph by  $G = (V, E)$ . For a subset  $W \subset V$ , the *induced sub-graph*  $G[W]$  is the graph whose vertex set is  $W$  and whose edge set consists of all the edges in  $E$  that have both endpoints in  $W$ . We use the standard notation  $N_G(W)$  to denote the neighbors of the vertices  $W$  in the graph  $G$ . A matching  $M$  in  $G$  is a set of pairwise non-adjacent edges. For our application, we care mostly about bipartite graphs; thus, we denote  $V = X \cup Y$ . An  $X$ -saturating matching is a matching that covers every node in  $X$ . Hall’s Marriage Theorem, a fundamental result in combinatorics, gives necessary and sufficient conditions for the existence of perfect matching. The theorem asserts that there exists an  $X$ -saturated matching in  $G$  if and only if for every subset  $W \subseteq X$ ,  $|W| \leq |N_G(W)|$ . In other words, the size of every subset in  $X$  does not exceed the number of its neighbors. The essential property we use in the PNE algorithm is *saturated sets*.

**Definition 1** (Saturated set). *Let  $G = (X \cup Y, E)$  be a finite bipartite graph. A set  $W \subseteq X$  is called saturated if  $|W| = |N_G(W)|$ .*

Of course, this definition naturally extends beyond bipartite graphs. Furthermore, if for every other saturated set  $W'$  it holds that  $|W| \geq |W'|$ , we say that  $W$  is a maximum saturated set. Despite its striking simplicity, to the best of our knowledge, this notion of saturated sets did not receive enough attention in the CS literature (under this name or a different one), and is therefore interesting in its own right.

#### 4.1 PNE Computation

We now turn to discuss the intuition behind Algorithm 1, which computes a PNE efficiently. By and large, Algorithm 1 can be seen as a best-response dynamic. It starts from a null profile (assigning all players to a factitious topic with zero user mass) and then determines the order of best-responding.

The input is the entire game description,<sup>8</sup> as described in Section 2. In Lines 1-5 we initialize the variables we use.  $\tilde{T}$  is the set of unmatched topics;  $L_k$  is a lower bound on the *load* on topic  $k$ , namely the ongoing number of players we matched to it;  $X, Y$  and  $E$  are the elements of the bipartite graph  $G$  ( $Y$  stores the set of unmatched players); and  $\mathbf{a}^*$  is a non-valid, empty profile that we construct as the algorithm advances. The for loop in Line 6 goes as follows. We first find the set of highest-quality players for every topic  $k$ , denoted  $A_k$  (Line 7). These players can block the others from playing  $k$  because their quality is higher, and thus we prioritize them in our sequential process. Afterwards, we set  $k^*$  to be the most profitable topic under the current partial matching (Line 8). That is, for every topic  $k$ , we consider the set of most profitable players w.r.t.  $k$  and their potential utility if matched to  $k$ . The term  $\mathcal{D}^{(k)}C_{j,k}/L_k+1$  upper bounds the utility of every player  $j \in A_k$  (see Equation (2)), in case we match  $L_k + 1$  or more players to topic  $k$  (we might increase the load  $L_k$  in later iterations). We subsequently update  $L_{K^*}$  in Line 9.

We now move to the bipartite graph  $G$ . In Line 10, we create a new node  $x$ , which is the  $L_{k^*}$ -copy of topic  $k^*$  (we store this information about  $x$ ). We add  $x$  to the left side of  $G$ ,  $X$  (Line 11), and connect

<sup>7</sup>There are exceptions, of course. In degenerate cases where  $\mathcal{Q}$  has no ties, the game is essentially a stable marriage problem.

<sup>8</sup>For the sake of illustration, we assume  $P \leq T$ . If that is not the case, we can add enough topics with zero mass  $\mathcal{D}$  to achieve it. Noticeably, a PNE in the new game can be converted to a PNE in the original game.

---

**Algorithm 1:** PNE computation
 

---

|                                                                                                                                                                                                                                                                                                                                                                                                                                                                                                                                                                                                                                                                                                                                                                                                                                                                                                                                              |                                                                                                                                                                                                                                                                                                                                                                                                                                                                                                                                                                                                                                                                                   |
|----------------------------------------------------------------------------------------------------------------------------------------------------------------------------------------------------------------------------------------------------------------------------------------------------------------------------------------------------------------------------------------------------------------------------------------------------------------------------------------------------------------------------------------------------------------------------------------------------------------------------------------------------------------------------------------------------------------------------------------------------------------------------------------------------------------------------------------------------------------------------------------------------------------------------------------------|-----------------------------------------------------------------------------------------------------------------------------------------------------------------------------------------------------------------------------------------------------------------------------------------------------------------------------------------------------------------------------------------------------------------------------------------------------------------------------------------------------------------------------------------------------------------------------------------------------------------------------------------------------------------------------------|
| <p><b>Input:</b> A game description <math>\langle \mathcal{P}, \mathcal{T}, \mathcal{D}, \mathcal{Q}, \mathcal{C} \rangle</math></p> <p><b>Output:</b> A PNE <math>\mathbf{a}</math></p> <pre> 1 <math>\tilde{\mathcal{T}} \leftarrow \mathcal{T}</math> // available topics 2 <math>\forall k \in \mathcal{T} : L_k \leftarrow 0</math> // loads on topic 3 <math>X \leftarrow \emptyset, Y \leftarrow \mathcal{P}, E \leftarrow \emptyset</math> 4 <math>G \leftarrow (X \cup Y, E)</math> 5 <math>\mathbf{a}^* \leftarrow (\emptyset)^m</math> // empty profile 6 <b>for</b> <math>t = 1 \dots P</math> 7   <math>\forall k \in \tilde{\mathcal{T}} : A_k \leftarrow \arg \max_{j \in Y} \mathcal{Q}_{j,k}</math> 8   <math>\text{set } k^* \in \arg \max_{k \in \tilde{\mathcal{T}}} \left\{ \max_{j \in A_k} \frac{\mathcal{D}^{(k)} \mathcal{C}_{j,k}}{L_k + 1} \right\}</math> 9   <math>L_{k^*} \leftarrow L_{k^*} + 1</math> </pre> | <pre> //for loop continues... 10 create a new node <math>x</math> associated with topic <math>k^*</math> 11 <math>X.add(x)</math> 12 <math>E.add(\{(x, j) : j \in A_{k^*}\})</math> 13 Let <math>W \subseteq X</math> be the maximum saturated set in <math>G</math> 14 <b>if</b> <math>W \neq \emptyset</math> <b>then</b> 15   find a maximum matching <math>M</math> in <math>G[W \cup Y]</math> 16   <math>\forall j \in N_G(W) : a_j^* \leftarrow \text{Topic}(M(j))</math> 17   <math>Y.remove(N_G(W))</math> 18   <math>X.remove(W)</math> 19   <math>\tilde{\mathcal{T}}.remove(\text{Topics}(W))</math> // see Line 10 20 <b>return</b> <math>\mathbf{a}^*</math> </pre> |
|----------------------------------------------------------------------------------------------------------------------------------------------------------------------------------------------------------------------------------------------------------------------------------------------------------------------------------------------------------------------------------------------------------------------------------------------------------------------------------------------------------------------------------------------------------------------------------------------------------------------------------------------------------------------------------------------------------------------------------------------------------------------------------------------------------------------------------------------------------------------------------------------------------------------------------------------|-----------------------------------------------------------------------------------------------------------------------------------------------------------------------------------------------------------------------------------------------------------------------------------------------------------------------------------------------------------------------------------------------------------------------------------------------------------------------------------------------------------------------------------------------------------------------------------------------------------------------------------------------------------------------------------|

---

$x$  to the players of  $A_{k^*}$  in  $Y$  (Line 12). Line 13 is the crux of the algorithm: We find a subset  $W$  of  $X$  that is the maximum saturated set. We will justify our use of the article *the* in the previous sentence later on, as well as describe the implications of having a saturated set in this dynamically constructed graph. If  $W$  is empty, we continue to the next iteration of the for loop. But if  $W$  is non-empty, we enter the if block in Line 14. We find a maximum matching  $M$  in the induced graph  $G[W \cup Y]$ . We will later prove that  $G[W \cup Y]$  satisfies Hall's marriage condition, and thus  $|M| = |W| = |N_G(W)|$ . In Line 16 we use  $M$  to set the strategies of the players in  $N_G(W)$ : Every player  $j \in N_G(W)$  is matched to the topic associated with the node  $M(j) \in W$ . In Lines 17-19 we remove the newly matched players  $N_G(W)$  from  $Y$ , the topic copies  $W$  from  $X$ , and the topics associated with  $W$  from the set of unmatched topics  $\tilde{\mathcal{T}}$ . We repeat this process until all players are matched.

Let us explain the implications of having a non-empty saturated set in  $G$ . Focus on the first time a non-empty saturated set  $W$  was found in Line 13, and denote the iteration index by  $t'$ . The set  $W$  is composed of nodes associated with several topics (association in the sense we explain about Line 10); each one may have several copies. Importantly, every time we add a node  $x$  to  $X$  with an associated topic  $k$ , we increased the load  $L_k$ ; hence, in iteration  $t'$ ,  $L_k$  accurately reflects the number of copies of  $k$  in  $X$ . Furthermore,  $k$  was selected for the  $L_k + 1$  time, suggesting that it is more profitable than other topics. With a few more arguments, we show that all  $L_k$  copies of  $k$  must be in  $W$ . Crucially, if we match the players in  $N_G(W)$  they cannot have beneficial deviations. We formalize this intuition via Theorem 3.

**Theorem 3.** *If the input game  $\mathcal{G}$  satisfies Assumption 1, then Algorithm 1 returns a PNE of  $\mathcal{G}$ .*

We now move on to discuss its run-time. The only two lines that require a non-trivial discussion are Lines 13 and 15. As we describe in Lemma 1 below, finding the maximum saturated set includes finding a maximum matching, and thus we need not recompute it in Line 15. We therefore focus on the complexity of finding the saturated set in  $G$  solely. The following Lemma 1 shows that as long as a bipartite  $G$  satisfies Hall's marriage condition, we can find the maximum saturated set  $W$  efficiently. Because of the independent interest in this combinatorial problem, we state it in its full generality.

**Lemma 1.** *Let  $G = (V, E)$  be a bipartite graph that satisfies Hall's marriage condition. There exists an algorithm that finds the maximum saturated set of  $G$  in time  $O(\sqrt{|V|}|E|)$ .*

The proof of this basic lemma appears in Subsection D.3. The sketch of the proof is as follows. Let  $G = (X \cup Y, E)$  be a graph satisfying Hall's marriage condition. We first compute a maximum matching  $M$  of  $G$ . Since Hall's marriage condition holds, we are guaranteed that  $M$  is an  $X$ -saturating matching. We then devise a technique to find whether a node  $x \in X$  participates in at least one saturated set. We show that nodes participating in saturated sets are reachable from the set of unmatched nodes in  $Y$  via a variation of alternating paths, and thus can be identified quickly. By the end of this procedure, we have a set  $X' \subseteq X$  such that every  $x \in X'$  participates in at least one saturated set. The last part is showing that under the marriage condition, every union of saturated sets is a saturated set. As a result, we conclude that  $X'$  is the maximum saturated set. Using Lemma 1, we can bound the run-time of Algorithm 1.

**Corollary 1.** *Algorithm 1 can be implemented in running time of  $O(P^{2.5} \cdot T)$ .*



## 5 Discussion

With great effort, companies like Amazon turned the “you bought that, would you also be interested in this” feature into a significant source of revenue. In this paper, we suggest that a “you wrote this, would you also be interested in writing on that?” feature could be revolutionary as well—contributing to better social welfare of content consumers, as well as the utility of content providers. Such a policy could be implemented in practice by a direct recommendation to providers, or by a more moderate action like nudging content providers to experiment with a different set of contents. To support our vision of content provider coordination in RSs even further, we show in Proposition 1 in Section A that the ratio between the social welfare of the best equilibrium and the worst equilibrium is unbounded. Indeed, such a coordination between content providers may lead to a significant lift in social welfare. More broadly, we note that maximizing the overall welfare of RSs with multiple stakeholders is an important challenge that goes way beyond this paper (see, e.g., [13]).

From a technical perspective, this work suggests a variety of open questions. First, the challenge of computing the social welfare-maximizing equilibrium is still open. Second, as we show in Proposition 2 in Section A that if Assumption 1 does not hold, BRDs may not converge. A recent work [6] demonstrates that using randomization in the recommendation function  $\mathcal{R}$  in a non-trivial manner can break this divergence. Finding a reasonable way to do so (in terms of social welfare) in our model is left as an open question. Third, implementing cooperation using other solution concepts like no-regret learning and correlated or coarse-correlated equilibrium are also natural extensions of this work. Lastly, our modeling neglects many real-world aspects of RSs: Providers join and leave the system, demand for content changes over time, providers create content of several types, etc. Future work with a more complex modeling is required for implementing our ideas in real-world applications.

### Broader Impact

It is well-understood in the Machine Learning community that economic aspects must be incorporated into machine learning algorithms. In that view, estimating content satisfaction in RSs is not enough. As we argue in this paper, content providers depend on the system for some part of their income; thus, their better treatment makes them the main beneficiaries of the stance this paper offers. We envision that RSs that will coordinate their content providers (and hence the content available for recommendation) will suffer from less fluctuations, be deemed fairer by all their stakeholders, and will enjoy long-term consumer engagement.

### Acknowledgements

We thank the anonymous reviewers for providing helpful and insightful comments. The work of O. Ben-Porat is partially funded by a PhD fellowship from JPMorgan Chase & Co. The work of M. Tennenholtz is funded by the European Research Council (ERC) under the European Union’s Horizon 2020 research and innovation programme (grant agreement n° 740435).

### References

- [1] Y. C. Academy. Lesson: Find your niche. URL <https://creatoracademy.youtube.com/page/lesson/niche>.
- [2] E. Anshelevich, A. Dasgupta, J. Kleinberg, E. Tardos, T. Wexler, and T. Roughgarden. The price of stability for network design with fair cost allocation. *SIAM Journal on Computing*, 38(4):1602–1623, 2008.
- [3] I. Ashlagi, D. Monderer, and M. Tennenholtz. On the value of correlation. *Journal of Artificial Intelligence Research*, 33:575–613, 2008.
- [4] R. Baeza-Yates, B. Ribeiro-Neto, et al. *Modern information retrieval*, volume 463. ACM press New York, 1999.
- [5] R. Ben Basat, M. Tennenholtz, and O. Kurland. A game theoretic analysis of the adversarial retrieval setting. *Journal of Artificial Intelligence Research*, 60:1127–1164, 2017.

- [6] O. Ben-Porat and M. Tennenholtz. A game-theoretic approach to recommendation systems with strategic content providers. In *Advances in Neural Information Processing Systems (NIPS) 2018*, 2018.
- [7] O. Ben-Porat and M. Tennenholtz. Regression equilibrium. In *Proceedings of the 2019 ACM Conference on Economics and Computation*, pages 173–191, 2019.
- [8] O. Ben-Porat, G. Goren, I. Rosenberg, and M. Tennenholtz. From recommendation systems to facility location games. In *Proceedings of the AAAI Conference on Artificial Intelligence*, volume 33, pages 1772–1779, 2019.
- [9] O. Ben-Porat, I. Rosenberg, and M. Tennenholtz. Convergence of learning dynamics in information retrieval games. In *The Thirty-Third AAAI Conference on Artificial Intelligence (AAAI 2019)*, 2019.
- [10] J. Bennett and S. Lanning. The netflix prize. In *Proceedings of KDD cup and workshop*, volume 2007, page 35, 2007.
- [11] O. Besbes, Y. Gur, and A. Zeevi. Optimization in online content recommendation services: Beyond click-through rates. *Manufacturing & Service Operations Management*, 18(1):15–33, 2016.
- [12] A. Beutel, J. Chen, T. Doshi, H. Qian, L. Wei, Y. Wu, L. Heldt, Z. Zhao, L. Hong, E. H. Chi, et al. Fairness in recommendation ranking through pairwise comparisons. In *Proceedings of the 25th ACM SIGKDD International Conference on Knowledge Discovery & Data Mining*, pages 2212–2220, 2019.
- [13] R. Burke. Multisided fairness for recommendation. *arXiv preprint arXiv:1707.00093*, 2017.
- [14] O. Butman, A. Shtok, O. Kurland, and D. Carmel. Query-performance prediction using minimal relevance feedback. In *Proceedings of ICTIR*, page 7, 2013.
- [15] C. Castillo. Fairness and transparency in ranking. In *ACM SIGIR Forum*, volume 52, pages 64–71. ACM, 2019.
- [16] F. Chierichetti, R. Kumar, S. Lattanzi, and S. Vassilvitskii. Fair clustering through fairlets. In *Advances in Neural Information Processing Systems*, pages 5036–5044, 2017.
- [17] G. Christodoulou and E. Koutsoupias. The price of anarchy of finite congestion games. In *Proceedings of the thirty-seventh annual ACM symposium on Theory of computing*, pages 67–73, 2005.
- [18] J. Cohen, A. Héliou, and P. Mertikopoulos. Learning with bandit feedback in potential games. In *Proceedings of the 31th International Conference on Neural Information Processing Systems*, 2017.
- [19] C. Dwork, M. Hardt, T. Pitassi, O. Reingold, and R. Zemel. Fairness through awareness. In *Proceedings of the 3rd innovations in theoretical computer science conference*, pages 214–226. ACM, 2012.
- [20] M. D. Ekstrand, R. Burke, and F. Diaz. Fairness and discrimination in retrieval and recommendation. In *Proceedings of the 42nd International ACM SIGIR Conference on Research and Development in Information Retrieval*, pages 1403–1404. ACM, 2019.
- [21] E. Even-Dar, A. Kesselman, and Y. Mansour. Convergence time to nash equilibrium in load balancing. *ACM Transactions on Algorithms (TALG)*, 3(3):32–es, 2007.
- [22] D. Gale and L. S. Shapley. College admissions and the stability of marriage. *The American Mathematical Monthly*, 69(1):9–15, 1962.
- [23] V. Garg and T. Jaakkola. Learning tree structured potential games. In *Advances In Neural Information Processing Systems (NIPS)*, pages 1552–1560, 2016.
- [24] A. Ghose, A. Goldfarb, and S. P. Han. How is the mobile internet different? search costs and local activities. *Information Systems Research*, 24(3):613–631, 2012.
- [25] J. E. Hopcroft and R. M. Karp. An  $n^{\frac{5}{2}}$  algorithm for maximum matchings in bipartite graphs. *SIAM Journal on computing*, 2(4):225–231, 1973.
- [26] E. Ie, V. Jain, J. Wang, S. Narvekar, R. Agarwal, R. Wu, H.-T. Cheng, T. Chandra, and C. Boutilier. Slateq: A tractable decomposition for reinforcement learning with recommendation sets. In *Proceedings of the Twenty-eighth International Joint Conference on Artificial Intelligence (IJCAI-19)*, pages 2592–2599, Macau, China, 2019.
- [27] T. Joachims, L. A. Granka, B. Pan, H. Hembrooke, and G. Gay. Accurately interpreting clickthrough data as implicit feedback. In *Proceedings of SIGIR*, pages 154–161, 2005.

- [28] Y. Koren, R. Bell, C. Volinsky, et al. Matrix factorization techniques for recommender systems. *Computer*, 42(8):30–37, 2009.
- [29] J. Leonhardt, A. Anand, and M. Khosla. User fairness in recommender systems. In *Companion Proceedings of The Web Conference 2018*, pages 101–102, 2018.
- [30] C. Liu and Y. Wei. The impacts of time constraint on users’ search strategy during search process. *Proceedings of the Association for Information Science and Technology*, 53(1), 2016.
- [31] L. Liu, S. Dean, E. Rolf, M. Simchowitz, and M. Hardt. Delayed impact of fair machine learning. In *International Conference on Machine Learning*, pages 3156–3164, 2018.
- [32] R. Mehrotra, J. McInerney, H. Bouchard, M. Lalmas, and F. Diaz. Towards a fair marketplace: Counterfactual evaluation of the trade-off between relevance, fairness & satisfaction in recommendation systems. In *Proceedings of the 27th ACM International Conference on Information and Knowledge Management*, pages 2243–2251. ACM, 2018.
- [33] M. Mladenov, E. Creager, O. Ben-Porat, K. Swersky, R. Zemel, and C. Boutilier. Optimizing long-term social welfare in recommender systems: A constrained matching approach. 2020.
- [34] N. Modani, D. Jain, U. Soni, G. K. Gupta, and P. Agarwal. Fairness aware recommendations on behance. In *Pacific-Asia Conference on Knowledge Discovery and Data Mining*, pages 144–155. Springer, 2017.
- [35] D. Monderer and L. S. Shapley. Potential games. *Games and economic behavior*, 14(1):124–143, 1996.
- [36] N. Nisan, T. Roughgarden, E. Tardos, and V. V. Vazirani. *Algorithmic game theory*, volume 1. Cambridge University Press Cambridge, 2007.
- [37] G. Palaiopoulos, I. Panageas, and G. Piliouras. Multiplicative weights update with constant step-size in congestion games: Convergence, limit cycles and chaos. In *Advances in Neural Information Processing Systems (NIPS)*, pages 5874–5884, 2017.
- [38] G. K. Patro, A. Biswas, N. Ganguly, K. P. Gummadi, and A. Chakraborty. Fairrec: Two-sided fairness for personalized recommendations in two-sided platforms. In *Proceedings of The Web Conference 2020, WWW ’20*, page 1194–1204, New York, NY, USA, 2020. Association for Computing Machinery. ISBN 9781450370233. doi: 10.1145/3366423.3380196.
- [39] D. Pedreshi, S. Ruggieri, and F. Turini. Discrimination-aware data mining. In *Proceedings of the 14th ACM SIGKDD International Conference on Knowledge Discovery and Data Mining*, pages 560–568. ACM, 2008.
- [40] L. Pizzato, T. Rej, T. Chung, I. Koprinska, and J. Kay. Recon: a reciprocal recommender for online dating. In *Proceedings of the Fourth ACM Conference on Recommender Systems*, pages 207–214. ACM, 2010.
- [41] G. Pleiss, M. Raghavan, F. Wu, J. Kleinberg, and K. Q. Weinberger. On fairness and calibration. In *Advances in Neural Information Processing Systems*, pages 5684–5693, 2017.
- [42] S. E. Robertson. The probability ranking principle in ir. *Journal of documentation*, 33(4):294–304, 1977.
- [43] T. Roughgarden. Intrinsic robustness of the price of anarchy. In *Proceedings of the forty-first annual ACM symposium on Theory of computing*, pages 513–522. ACM, 2009.
- [44] A. Singh and T. Joachims. Fairness of exposure in rankings. In *Proceedings of the 24th ACM SIGKDD International Conference on Knowledge Discovery & Data Mining*, pages 2219–2228. ACM, 2018.
- [45] T. Sühr, A. J. Biega, M. Zehlike, K. P. Gummadi, and A. Chakraborty. Two-sided fairness for repeated matchings in two-sided markets: A case study of a ride-hailing platform. In *Proceedings of the 25th ACM SIGKDD International Conference on Knowledge Discovery & Data Mining*, pages 3082–3092. ACM, 2019.
- [46] M. Tennenholtz and O. Kurland. Rethinking search engines and recommendation systems: a game theoretic perspective. *Communications of the ACM*, 62(12):66–75, 2019.
- [47] S. Yao and B. Huang. Beyond parity: Fairness objectives for collaborative filtering. In *Advances in Neural Information Processing Systems*, pages 2921–2930, 2017.
- [48] H. Yu, C. Liu, and F. ZHANG. Reciprocal recommendation algorithm for the field of recruitment. *Journal of Information & Computational Science*, 8(16):4061–4068, 2011.

- [49] R. Zemel, Y. Wu, K. Swersky, T. Pitassi, and C. Dwork. Learning fair representations. In *Proceedings of the 30th International Conference on Machine Learning (ICML-13)*, pages 325–333, 2013.
- [50] Y. Zheng. Multi-stakeholder recommendation: Applications and challenges. *arXiv preprint arXiv:1707.08913*, 2017.

| Symbol                   | Description                                                                                       | First introduced |
|--------------------------|---------------------------------------------------------------------------------------------------|------------------|
| $\mathcal{P}$            | set of players, $\mathcal{P} = \{1, 2, \dots, P\}$                                                | Section 2        |
| $P$                      | number of players, $P =  \mathcal{P} $                                                            | Section 2        |
| $\mathcal{T}$            | set of topics, $\mathcal{T} = \{1, 2, \dots, T\}$                                                 | Section 2        |
| $T$                      | number of topics, $T =  \mathcal{T} $                                                             | Section 2        |
| $\mathbf{a}$             | strategy profile, $\mathbf{a} = (a_1, a_2, \dots, a_P)$                                           | Section 2        |
| $j$                      | player index, $j \in \mathcal{P}$                                                                 | Section 2        |
| $k$                      | topic index, $k \in \mathcal{T}$                                                                  | Section 2        |
| $\mathcal{Q}$            | quality matrix, $\mathcal{Q}_{j,k}$ is the quality of player $j$ on topic $k$                     | Section 2        |
| $\mathcal{D}$            | user mass over topics, $\mathcal{D}(k)$ is the demand for topic $k$                               | Section 2        |
| $\mathcal{R}$            | Recommendation function                                                                           | Section 2        |
| $\mathcal{C}$            | conversion matrix, $\mathcal{C}_{j,k}$ is the conversion of player $j$ on topic $k$               | Section 2        |
| $\mathcal{U}$            | utility function, $\mathcal{U}_j(\mathbf{a})$ is player $j$ 's utility under profile $\mathbf{a}$ | Section 2        |
| $B_k(\mathbf{a})$        | highest quality of blog written on $k$ under profile $\mathbf{a}$                                 | Section 2        |
| $H_k(\mathbf{a})$        | number of top-quality bloggers on topic $k$ under profile $\mathbf{a}$ $\mathcal{R}$              | Section 2        |
| $G = (X \cup Y, E)$      | bipartite graph with parts $X$ and $Y$                                                            | Section 4        |
| $W$                      | subset of nodes in a graph (in the context of saturated sets)                                     | Section 4        |
| $A_k$                    | set of high-quality authors on topic $k$                                                          | Algorithm 1      |
| $L_k$                    | load on topic $k$                                                                                 | Algorithm 1      |
| $M$                      | partial matching in a graph                                                                       | Algorithm 1      |
| $Z_k(\mathbf{a})$        | highest conversion of displayed content on topic $k$ under profile $\mathbf{a}$                   | Section B        |
| $\gamma$                 | an improvement path, better-respond dynamic                                                       | Section B        |
| $\underline{H}_k$        | minimal $H_k$ value throughout the path $\gamma$                                                  | Section B        |
| $\overline{B}_k$         | maximal $B_k$ value throughout the path $\gamma$                                                  | Section B        |
| $\overline{Z}_k(\gamma)$ | maximal $Z_k$ value throughout the path $\gamma$                                                  | Section B        |
| $p$                      | parameter of <code>Recurse</code> , indicates the number of players                               | Section C        |
| $s$                      | parameter of <code>Recurse</code> , indicates the available topics                                | Section C        |

Figure 2: Notation table.

## A Omitted Claims from Section 5

### A.1 The Value of Coordination

Many worst-case measures of the inefficiency due to selfish behavior were proposed over the years, e.g., the Price of Anarchy [17, 43]. In this work, however, we care about social welfare and the impact of intervention in the dynamic (that we introduce in Section 3); thus, to distill the lift in social welfare due to coordination, we focus on the Price of Correlation [3].

**Definition 2.** Given a game instance, the Price of Correlation is  $PoC \stackrel{\text{def}}{=} \frac{\max_{e \in E} SW(e)}{\min_{e' \in E} SW(e')}$ , where  $E$  is the set of PNE profiles.

**Proposition 1.** The price of Correlation can be unbounded.

*Proof.* The construction relies on the tension between content quality and conversion. Consider the following two-player ( $P = 2$ ) with two topics ( $T = 2$ ). Let the demand distribution  $\mathcal{D}$  such that  $\mathcal{D}(1) = 1 - \epsilon$ ,  $\mathcal{D}(2) = \epsilon$ , and let the quality and conversion matrices be

$$\mathcal{Q} = \begin{pmatrix} 1 & 1 \\ \epsilon & 1 \end{pmatrix}, \quad \mathcal{C} = \begin{pmatrix} \epsilon/1-\epsilon & 1 \\ \epsilon & 1 \end{pmatrix}.$$

The normal-form game resulting from this bi-matrix is

$$\begin{array}{cc} & \begin{array}{cc} \text{topic 1} & \text{topic 2} \end{array} \\ \begin{array}{c} \text{topic 1} \\ \text{topic 2} \end{array} & \left[ \begin{array}{cc} \epsilon, 0 & \epsilon, \epsilon \\ \epsilon, (1-\epsilon)\epsilon & \frac{\epsilon}{2}, \frac{\epsilon}{2} \end{array} \right] \end{array}$$

It is immediate to see that both profiles (1, 2) and (2, 1) are in equilibrium. However,  $SW(1, 2) = 1$ , while  $SW(2, 1) = \epsilon(1 - \epsilon) + \epsilon < 2\epsilon$ . The result is obtained when taking  $\epsilon$  to zero.  $\square$

## A.2 Relaxing Assumption 1

**Proposition 2.** *If Assumption 1 does not hold, there can be infinite BRDs.*

*Proof.* It suffices to show a better-response cycle. Consider the following three-player ( $P = 3$ ) with three topics ( $T = 3$ ). Let the demand distribution  $\mathcal{D}$  such that  $\mathcal{D}(1) = \mathcal{D}(2) = \mathcal{D}(3) = d = \frac{1}{3}$ , and let the quality and conversion matrices be

$$\mathcal{Q} = q \begin{pmatrix} 1 & 10 & 10 \\ 10 & 1 & 0 \\ 0 & 5 & 5 \end{pmatrix}, \quad \mathcal{C} = c \begin{pmatrix} 10 & 1 & 5 \\ 1 & 10 & 0 \\ 0 & 1 & 5 \end{pmatrix}.$$

for  $0 < q \leq \frac{1}{10}$  and  $0 < c \leq \frac{1}{30}$ . From here on, since the utilities are linear in the term  $cdq$ , we omit it from the analysis. Let  $\mathbf{a}^0 = (2, 1, 3)$ . Consider the following sequence of better improvements:

1.  $\mathbf{a}^1 = (3, 1, 3)$ . Player 1 is the deviating one, and  $1 = \mathcal{U}_1(\mathbf{a}^0) < \mathcal{U}_1(\mathbf{a}^1) = 5$ .
2.  $\mathbf{a}^2 = (3, 2, 3)$ . Player 2 is the deviating one, and  $1 = \mathcal{U}_2(\mathbf{a}^1) < \mathcal{U}_2(\mathbf{a}^2) = 10$ .
3.  $\mathbf{a}^3 = (3, 2, 2)$ . Player 3 is the deviating one, and  $0 = \mathcal{U}_3(\mathbf{a}^2) < \mathcal{U}_3(\mathbf{a}^3) = 1$ .
4.  $\mathbf{a}^4 = (1, 2, 2)$ . Player 1 is the deviating one, and  $5 = \mathcal{U}_1(\mathbf{a}^3) < \mathcal{U}_1(\mathbf{a}^4) = 10$ .
5.  $\mathbf{a}^5 = (1, 1, 2)$ . Player 2 is the deviating one, and  $0 = \mathcal{U}_2(\mathbf{a}^4) < \mathcal{U}_2(\mathbf{a}^5) = 1$ .
6.  $\mathbf{a}^6 = (2, 1, 2)$ . Player 1 is the deviating one, and  $0 = \mathcal{U}_1(\mathbf{a}^5) < \mathcal{U}_1(\mathbf{a}^6) = 1$ .
7.  $\mathbf{a}^7 = (2, 1, 3)$ . Player 3 is the deviating one, and  $0 = \mathcal{U}_3(\mathbf{a}^6) < \mathcal{U}_3(\mathbf{a}^7) = 5$ .

Notice that  $\mathbf{a}^0 = \mathbf{a}^7$ , hence this is indeed an improvement cycle.  $\square$

## B Proof of Theorem 1

In this section, we formally prove Theorem 1. We begin by setting a few convenient notations in Subsection B.1, prove some useful claims in Subsection B.2, and finally prove the theorem in Subsection B.3.

### B.1 Notations for this Section

In addition to  $H_k(\mathbf{a})$  and  $B_k(\mathbf{a})$  introduced in Section 2, we also let

$$Z_k(\mathbf{a}) = \max_{1 \leq j \leq n} \{\mathbb{1}_{j \in H_k(\mathbf{a})} \mathcal{C}_{j,k}\}.$$

In words,  $Z_k(\mathbf{a})$  is the highest conversion of a player writing on topic  $k$  under the strategy profile  $\mathbf{a}$ . We denote an improvement path, i.e., a sequence of improvement profiles by  $\gamma$ . For a given  $\gamma$ , we use  $\overline{B}_k(\gamma) \stackrel{\text{def}}{=} \max_{\mathbf{a} \in \gamma} B_k(\mathbf{a})$  to denote the highest value of  $B_k$  along the profiles on the path  $\gamma$ . Similarly, we let  $\underline{H}_k(\gamma) \stackrel{\text{def}}{=} \min_{\mathbf{a} \in \gamma} |H_k(\mathbf{a})|$  be the minimal size of  $H_k$  along  $\gamma$ , and  $\overline{Z}_k(\gamma) \stackrel{\text{def}}{=} \max_{\mathbf{a} \in \gamma} Z_k(\mathbf{a})$  be the highest  $Z_k$  along  $\gamma$ .

Finally, when a strategy profile  $\mathbf{a}^r$  is part of an improvement path, we use  $p_r$  to denote the index of the deviating player. Namely  $p_r$  is the only player such that  $a_{p_r}^r \neq a_{p_r}^{r+1}$ .

### B.2 Useful Claims

The following observation is an immediate corollary of Assumption 1.

**Observation 1.** *If  $\mathcal{Q}_{k,j_1} = \mathcal{Q}_{k,j_2}$  for some topic  $k \in M$  and two players  $j_1, j_2 \in N$ , then  $\mathcal{C}_{k,j_1} = \mathcal{C}_{k,j_2}$*

The next proposition shows that after a deviation to a topic, the highest quality on that topic can only increase.

**Proposition 3.** Let  $\gamma$  be a finite improvement path, and let  $a_{p_r}^{r+1} = k$  for an arbitrary improvement step  $r$ . It holds that  $\mathcal{Q}_{p_r, k} \geq B_k(\mathbf{a}^r)$ .

**Proof of Proposition 3.** Since author  $p_r$  improves her utility,  $\mathcal{U}_{p_r}(\mathbf{a}^r) < \mathcal{U}_{p_r}(\mathbf{a}^{r+1})$ . By definition of  $\mathcal{R}^{\text{top}}$ , if  $\mathcal{Q}_{p_r, k} < B_k(\mathbf{a}^r)$  then  $\mathcal{U}_{p_r}(\mathbf{a}^{r+1}) = 0 \leq \mathcal{U}_{p_r}(\mathbf{a}^r)$ , which results in a contradiction.  $\square$

In Proposition 4 we bound the utility of an improving author in an improvement step.

**Proposition 4.** Let  $\gamma$  be a finite improvement path, and let  $a_{p_r}^{r+1} = k$  for an arbitrary improvement step  $r$ . If  $\mathcal{Q}_{p_r, k} \leq B_k(\mathbf{a}^r)$ , then

$$\mathcal{U}_{p_r}(\mathbf{a}^{r+1}) \leq \frac{\mathcal{D}(k) \cdot \overline{Z}_k(\gamma)}{\underline{H}_k(\gamma) + 1}.$$

**Proof of Proposition 4.** We are given that  $\mathcal{Q}_{p_r, k} \leq B_k(\mathbf{a}^r)$ . Combined with Proposition 3, we know that

$$\mathcal{Q}_{p_r, k} = B_k(\mathbf{a}^r). \quad (4)$$

Notice that  $a_{p_r}^r \neq k$  and  $a_{p_r}^{r+1} = k$ ; hence, together with Equation (4) we obtain

$$|H_k(\mathbf{a}^{r+1})| = |H_k(\mathbf{a}^r)| + 1 \stackrel{\text{Def. of } \underline{H}_k(\gamma)}{\geq} \underline{H}_k(\gamma) + 1. \quad (5)$$

Observe that Equation (5) suggests that

$$\mathcal{U}_{p_r}(\mathbf{a}^{r+1}) = \frac{\mathcal{D}(k) \cdot \mathcal{C}_{p_r, k}}{|H_k(\mathbf{a}^{r+1})|} = \frac{\mathcal{D}(k) \cdot \mathcal{C}_{p_r, k}}{|H_k(\mathbf{a}^r)| + 1} \leq \frac{\mathcal{D}(k) \cdot \mathcal{C}_{p_r, k}}{\underline{H}_k(\gamma) + 1} \leq \frac{\mathcal{D}(k) \cdot \overline{Z}_k(\gamma)}{\underline{H}_k(\gamma) + 1},$$

where the last inequality holds since  $\mathcal{C}_{p_r, k} \leq Z_k(\mathbf{a}^{r+1}) \leq \overline{Z}_k(\gamma)$ . This concludes the proof of this proposition.  $\square$

**Proposition 5.** If  $c = (\mathbf{a}^1, \dots, \mathbf{a}^l = \mathbf{a}^1)$  is an improvement cycle and  $k$  is a topic such that

1. there exists an improvement step  $r_1$  satisfying  $|H_k(\mathbf{a}^{r_1})| \neq |H_k(\mathbf{a}^{r_1+1})|$ , and
2. for every improvement step  $r_2$ ,  $B_k(\mathbf{a}^{r_2}) = \overline{B}_k(c)$ ,

then there exist an index  $r$  such that  $a_{p_r}^r = k$  and

$$\mathcal{U}_{p_r}(\mathbf{a}^r) = \frac{\mathcal{D}(k) \cdot \overline{Z}_k(c)}{\underline{H}_k(c) + 1}.$$

**Proof of Proposition 5.** From Property 1 we know that there exists an improvement step  $r_1$  such that  $|H_k(\mathbf{a}^{r_1})| \neq |H_k(\mathbf{a}^{r_1+1})|$ . Assume w.l.o.g. that  $|H_k(\mathbf{a}^{r_1})| > |H_k(\mathbf{a}^{r_1+1})|$ ; hence

$$|H_k(\mathbf{a}^{r_1})| > |H_k(\mathbf{a}^{r_1+1})| \geq \underline{H}_k(c); \quad (6)$$

hence,  $|H_k(\mathbf{a}^{r_1})| \geq \underline{H}_k(c) + 1$ . By definition of  $\underline{H}_k(c)$  we know that there exists an improvement step  $r_3$  such that

$$|H_k(\mathbf{a}^{r_3})| = \underline{H}_k(c). \quad (7)$$

From Property 2 we get that for every improvement step  $r_2$ ,  $B_k(\mathbf{a}^{r_2}) = \overline{B}_k(c)$ , which implies that

$$||H_k(\mathbf{a}^{r_2})| - |H_k(\mathbf{a}^{r_2+1})|| \leq 1. \quad (8)$$

Moreover, Property 2 along with Assumption 1 imply that

$$\mathcal{C}_{p_{r_2}, k} = \overline{Z}_k(c). \quad (9)$$

Combining Equations (6)-(9) with the fact that  $c$  is an improvement cycle leads to the existence of an improvement step  $r$  such that  $\mathbf{a}^r \in \{\mathbf{a}^{r_1}, \mathbf{a}^{r_1+1}, \dots, \mathbf{a}^{r_3-1}\}$ ,  $|H_k(\mathbf{a}^r)| = \underline{H}_k(c) + 1$ , and  $|H_k(\mathbf{a}^{r+1})| = \underline{H}_k(c)$ . This suggests that  $a_{p_r}^r = k$  and  $\mathcal{Q}_{p_r, k} = B_k(\mathbf{a}^r) = \overline{B}_k(c)$ ; therefore,

$$\mathcal{U}_{p_r}(\mathbf{a}^r) = \frac{\mathcal{D}(k) \cdot \mathcal{C}_{p_r, k}}{|H_k(\mathbf{a}^r)|} = \frac{\mathcal{D}(k) \cdot \overline{Z}_k(c)}{\underline{H}_k(c) + 1}.$$

$\square$

### B.3 Proof of Theorem 1

To ease the presentation, throughout this subsection we re-index the topics according to the following order

$$\mathcal{D}(1) \cdot \overline{Z}_1(c) \geq \mathcal{D}(2) \cdot \overline{Z}_2(c) \geq \dots \geq \mathcal{D}(T) \cdot \overline{Z}_T(c).$$

The proof of Theorem 1 relies on several supporting lemmas, which are proven first.

**Lemma 2.** *If  $c = (\mathbf{a}^1, \dots, \mathbf{a}^l = \mathbf{a}^1)$  is an improvement cycle, then for every improvement step  $r$  and every topic  $k$  it holds that  $B_k(\mathbf{a}^r) = B_k(\mathbf{a}^{r+1})$ .*

**Proof of Lemma 2.** Assume w.l.o.g. that  $c$  is a simple improvement cycle. It suffices to show that  $B_k(\mathbf{a}^r) \leq B_k(\mathbf{a}^{r+1})$  for every  $r$  and  $k$ , since this implies

$$B_k(\mathbf{a}^1) \leq B_k(\mathbf{a}^2) \leq \dots \leq B_k(\mathbf{a}^{l-1}) \leq B_k(\mathbf{a}^l) = B_k(\mathbf{a}^1).$$

The left-hand-side and the right-hand-side of the inequality above are identical; thus, they must all hold in equality.

We prove by induction on the topic index  $k$  that  $B_k(\mathbf{a}^r) \leq B_k(\mathbf{a}^{r+1})$  holds for every  $r$ ,  $1 \leq r \leq l-1$ .

**Base case** As we elaborate shortly, the base case is a special case of the Step.

**Step** Suppose the assertion holds for every  $k$  where  $k < K \leq T$ , but does not hold for  $K$  (where  $K = 1$  is the inductive base, for which we assume nothing). For better readability, we divide the analysis into parts.

**Part 1:** By definition of  $\overline{B}_K(c)$ , there exists  $r', 1 \leq r' \leq l-1$  such that  $B_K(\mathbf{a}^{r'}) = \overline{B}_K(c)$ . Since the assertion does not hold for  $K$ , there exists  $r'', 1 \leq r'' \leq l-1$ , such that  $B_K(\mathbf{a}^{r''}) > B_K(\mathbf{a}^{r''+1})$ . Therefore, as  $c$  is an improvement cycle, there exists  $r_1$  such that  $\mathbf{a}^{r_1} \in \{\mathbf{a}^{r'}, \mathbf{a}^{r'+1}, \dots, \mathbf{a}^{r''}\}$  and  $\overline{B}_K(c) = B_K(\mathbf{a}^{r_1}) > B_K(\mathbf{a}^{r_1+1})$ .

As a result, it holds for the improving author  $p_{r_1}$  in step  $r_1$  that  $\mathcal{Q}_{p_{r_1}, K} = \overline{B}_K(c) > B_K(\mathbf{a}_{p_{r_1}}^{r_1})$  and  $|H_K(\mathbf{a}^{r_1})| = 1$ . Put differently, the quality of author  $p_{r_1}$ 's document exceeds all other qualities under  $\mathbf{a}^{r_1}$  on topic  $K$ ; thus,

$$\mathcal{U}_{p_{r_1}}(\mathbf{a}^{r_1}) = \mathcal{D}(K) \cdot \overline{Z}_K(c). \quad (10)$$

In addition,  $p_{r_1}$  is the improving author so  $\mathcal{U}_{p_{r_1}}(\mathbf{a}^{r_1}) < \mathcal{U}_{p_{r_1}}(\mathbf{a}^{r_1+1})$ ; hence, with Equation (10) we get

$$\mathcal{D}(K) \cdot \overline{Z}_K(c) < \mathcal{U}_{p_{r_1}}(\mathbf{a}^{r_1+1}). \quad (11)$$

Let  $k_1$  denote the topic that author  $p_{r_1}$  is writing on under  $\mathbf{a}^{r_1+1}$ , i.e.  $k_1 = a_{p_{r_1}}^{r_1+1}$ . By definition of  $\mathcal{U}$  we obtain

$$\mathcal{U}_{p_{r_1}}(\mathbf{a}^{r_1+1}) \leq \mathcal{D}(k_1) \cdot \mathcal{C}_{p_{r_1}, k_1} \leq \mathcal{D}(k_1) \cdot \overline{Z}_{k_1}(c). \quad (12)$$

Inequalities (11) and (12) suggest that  $\mathcal{D}(K) \cdot \overline{B}_K(c) < \mathcal{D}(k_1) \cdot \overline{B}_{k_1}(c)$  holds. Recall that we re-indexed the topics according to a decreasing order of  $D \cdot V$ , and hence  $k_1 < K$  (for the base case  $K = 1$  and thus we get a contradiction). To summarize this part, we conclude that there must exist a topic  $k_1$  such that  $k_1 < K$  and  $\mathcal{D}(k_1) \cdot \overline{Z}_{k_1}(c) \geq \mathcal{D}(K) \cdot \overline{Z}_K(c)$ .

**Part 2:** Since  $k_1 < K$ , the induction hypothesis hints that  $B_{k_1}(\mathbf{a}^{r_1}) = B_{k_1}(\mathbf{a}^{r_1+1})$ ; therefore,  $\mathcal{Q}_{p_{r_1}, k_1} \leq B_{k_1}(\mathbf{a}^{r_1})$  holds and by Proposition 3 we get that  $\mathcal{Q}_{p_{r_1}, k_1} = B_{k_1}(\mathbf{a}^{r_1})$ . By invoking Proposition 4 for  $c, r_1$  and  $k_1$  we get

$$\mathcal{U}_{p_{r_1}}(\mathbf{a}^{r_1+1}) \leq \frac{\mathcal{D}(k_1) \cdot \overline{Z}_{k_1}(c)}{\underline{H}_{k_1}(c) + 1}.$$

Together with Inequality (11), we conclude that

$$\mathcal{D}(K) \cdot \overline{Z}_K(c) < \frac{\mathcal{D}(k_1) \cdot \overline{Z}_{k_1}(c)}{\underline{H}_{k_1}(c) + 1}. \quad (13)$$



Next, we wish to find an improvement step such that the improving author's utility strictly bounds the right-hand-side of Inequality (13). Since  $a_{p_{r_1}}^{r_1+1} = k_1$  and  $\mathcal{Q}_{p_{r_1}, k_1} = B_{k_1}(\mathbf{a}^{r_1})$  we get that  $|H_{k_1}(\mathbf{a}^{r_1})| \neq |H_{k_1}(\mathbf{a}^{r_1+1})|$ . The inductive assumption suggests that for every improvement step  $r'$ ,  $B_{k_1}(\mathbf{a}^{r'}) = \overline{B_{k_1}(c)}$ ; therefore, we can invoke Proposition 5. Proposition 5 guarantees the existence of a step  $r_2$  such that  $a_{p_{r_2}}^{r_2} = k_1$  and

$$\frac{\mathcal{D}(k_1) \cdot \overline{Z_{k_1}(c)}}{H_{k_1}(c) + 1} = \mathcal{U}_{p_{r_2}}(\mathbf{a}^{r_2}). \quad (14)$$

Since  $p_{r_2}$  is the improving author  $\mathcal{U}_{p_{r_2}}(\mathbf{a}^{r_2}) < \mathcal{U}_{p_{r_2}}(\mathbf{a}^{r_2+1})$  holds, which together with Equation (14) implies

$$\frac{\mathcal{D}(k_1) \cdot \overline{Z_{k_1}(c)}}{H_{k_1}(c) + 1} < \mathcal{U}_{p_{r_2}}(\mathbf{a}^{r_2+1}). \quad (15)$$

Let  $a_{p_{r_2}}^{r_2+1} = k_2$ . By definition of  $\mathcal{U}$ , we know that

$$\mathcal{U}_{p_{r_2}}(\mathbf{a}^{r_2+1}) \leq \mathcal{D}(k_2) \cdot \overline{Z_{k_2}(c)}. \quad (16)$$

The crucial observation is that  $k_2 < K$  must hold. To see this, assume otherwise that  $k_2 \geq K$ , and  $\mathcal{D}(k_2) \cdot \overline{Z_{k_2}(c)} \leq \mathcal{D}(K) \cdot \overline{Z_K}(c)$  follows for the re-indexing of topics. Incorporating Inequalities (13), (15) and (16) we obtain

$$\mathcal{D}(K) \cdot \overline{Z_K}(c) < \frac{\mathcal{D}(k_1) \cdot \overline{Z_{k_1}(c)}}{H_{k_1}(c) + 1} < \mathcal{U}_{p_{r_2}}(\mathbf{a}^{r_2+1}) \leq \mathcal{D}(k_2) \cdot \overline{Z_{k_2}(c)} \leq \mathcal{D}(K) \cdot \overline{Z_K}(c),$$

which is a contradiction; hence,  $k_2 < K$ .

To complete this step, notice that the inductive hypothesis suggests that  $B_{k_2}(\mathbf{a}^{r_2}) = B_{k_2}(\mathbf{a}^{r_2+1})$ , implying  $\mathcal{Q}_{p_{r_2}, k_2} \leq B_{k_2}(\mathbf{a}^{r_2})$ . By invoking Proposition 4 for  $c, r_2$ , and  $k_2$  we conclude that

$$\mathcal{U}_{p_{r_2}}(\mathbf{a}^{r_2+1}) \leq \frac{\mathcal{D}(k_2) \cdot \overline{Z_{k_2}(c)}}{H_{k_2}(c) + 1}.$$

Together with Inequality (15), we conclude that

$$\frac{\mathcal{D}(k_1) \cdot \overline{Z_{k_1}(c)}}{H_{k_1}(c) + 1} < \frac{\mathcal{D}(k_2) \cdot \overline{Z_{k_2}(c)}}{H_{k_2}(c) + 1}. \quad (17)$$

To summarize this part, we conclude that there must exist a topic  $k_2$ ,  $k_2 < K$  and  $k_2 \neq k_1$  that satisfies Inequality (17).

**Part 3:** We repeat the process in Part 2 to obtain additional topics  $k_3, k_4, \dots, k_K$ , such that for all  $i \in [K]$ ,  $k_i < K$  and

$$\frac{\mathcal{D}(k_1) \cdot \overline{Z_{k_1}(c)}}{H_{k_1}(c) + 1} < \frac{\mathcal{D}(k_2) \cdot \overline{Z_{k_2}(c)}}{H_{k_2}(c) + 1} < \frac{\mathcal{D}(k_3) \cdot \overline{Z_{k_3}(c)}}{H_{k_3}(c) + 1} < \dots < \frac{\mathcal{D}(k_K) \cdot \overline{Z_{k_K}(c)}}{H_{k_K}(c) + 1}.$$

While the inequality above contains  $K$  elements, there are only  $K - 1$  topics with index lower than  $K$ ; hence, at least two of them must be identical, and we obtain a contradiction. We conclude that  $B_K(\mathbf{a}^r) \leq B_K(\mathbf{a}^{r+1})$  for every step  $r$ . This completes the proof of the induction.  $\square$

In addition,

**Lemma 3.** *If  $c = (\mathbf{a}^1, \dots, \mathbf{a}^l = \mathbf{a}^1)$  is an improvement cycle, then for every improvement step  $r$  and topic  $k$  such that  $a_{p_r}^{r+1} = k$  there exist  $(r', k')$  such that  $a_{p_{r'}}^{r'+1} = k'$  and*

$$\frac{\mathcal{D}(k) \cdot \overline{Z_k}(c)}{H_k(c) + 1} < \frac{\mathcal{D}(k') \cdot \overline{Z_{k'}}(c)}{H_{k'}(c) + 1}.$$

**Proof of Lemma 3.** Let  $r, k$  such that  $a_{p_r}^{r+1} = k$ . From Lemma 2, we know that for every improvement step  $r''$ ,  $B_k(\mathbf{a}^{r''}) = \overline{B_k}(c)$ ; thus,  $\mathcal{Q}_{p_r, k} \leq B_k(\mathbf{a}^r)$  which by Proposition 3 leads to

$$\mathcal{Q}_{p_r, k} = B_k(\mathbf{a}^r) = \overline{B_k}(c). \quad (18)$$

By definition of improvement step,  $a_{p_r}^r \neq k$ ; hence, together with Equation (18), we get that  $|H_k(\mathbf{a}^r)| \neq |H_k(\mathbf{a}^{r+1})|$ . Notice that  $c$  is a finite improvement path, and that the conditions of Proposition 5 holds; thus, by invoking it for  $c, r$ , and  $k$  we conclude the existence of an index  $r'$  such that  $a_{p_{r'}}^{r'} = k$  and

$$\frac{\mathcal{D}(k) \cdot \overline{Z_k}(c)}{\underline{H_k}(c) + 1} = \mathcal{U}_{p_{r'}}(\mathbf{a}^{r'}).$$

In addition,  $p_{r'}$  is the improving author, and so

$$\frac{\mathcal{D}(k) \cdot \overline{Z_k}(c)}{\underline{H_k}(c) + 1} = \mathcal{U}_{p_{r'}}(\mathbf{a}^{r'}) < \mathcal{U}_{p_{r'}}(\mathbf{a}^{r'+1}). \quad (19)$$

Clearly,  $a_{p_{r'}}^{r'+1} = k' \neq k$ . Lemma 2 indicates that  $B_{k'}(\mathbf{a}^{r'}) = B_{k'}(\mathbf{a}^{r'+1})$ ; hence,  $\mathcal{Q}_{p_{r'}, k'} \leq B_{k'}(\mathbf{a}^{r'})$ . Having showed the condition of Proposition 4 holds, we invoke it for  $r', k'$  and conclude that

$$\mathcal{U}_{p_{r'}}(\mathbf{a}^{r'+1}) \leq \frac{\mathcal{D}(k') \cdot \overline{Z_{k'}}(c)}{\underline{H_{k'}}(c) + 1}.$$

Combining the above inequality with Inequality (19), we have

$$\frac{\mathcal{D}(k) \cdot \overline{Z_k}(c)}{\underline{H_k}(c) + 1} < \frac{\mathcal{D}(k') \cdot \overline{Z_{k'}}(c)}{\underline{H_{k'}}(c) + 1}.$$

□

We are now ready to prove Theorem 1.

**Proof of Theorem 1.** Let  $\gamma$  be any arbitrary improvement path. Since there is a finite number of different strategy profiles,  $\gamma$  can only be infinite if it contains cycles. Assume by contradiction that  $\gamma$  contains an improvement cycle  $c = (\mathbf{a}^1, \mathbf{a}^2, \dots, \mathbf{a}^l = \mathbf{a}^1)$ . Let  $r_1$  be an arbitrary improvement step and denote by  $k_1$  the topic such that  $a_{p_{r_1}}^{r_1+1} = k_1$ . From Lemma 3 we know that there exist  $(r_2, k_2)$  such that  $a_{p_{r_2}}^{r_2+1} = k_2$  and

$$\frac{\mathcal{D}(k_1) \cdot \overline{Z_{k_1}}(c)}{\underline{H_{k_1}}(c) + 1} < \frac{\mathcal{D}(k_2) \cdot \overline{Z_{k_2}}(c)}{\underline{H_{k_2}}(c) + 1}.$$

Since  $a_{p_{r_2}}^{r_2+1} = k_2$ , we can now use Lemma 3 again in order to find  $(r_3, k_3)$  such that  $a_{p_{r_3}}^{r_3+1} = k_3$  and

$$\frac{\mathcal{D}(k_2) \cdot \overline{Z_{k_2}}(c)}{\underline{H_{k_2}}(c) + 1} < \frac{\mathcal{D}(k_3) \cdot \overline{Z_{k_3}}(c)}{\underline{H_{k_3}}(c) + 1}.$$

This process can be extended to achieve additional  $k_4, k_5, \dots, k_{T+1}$  such that

$$\frac{\mathcal{D}(k_1) \cdot \overline{Z_{k_1}}(c)}{\underline{H_{k_1}}(c) + 1} < \frac{\mathcal{D}(k_2) \cdot \overline{Z_{k_2}}(c)}{\underline{H_{k_2}}(c) + 1} < \dots < \frac{\mathcal{D}(k_{T+1}) \cdot \overline{Z_{k_{T+1}}}(c)}{\underline{H_{k_{T+1}}}(c) + 1}.$$

Since there are only  $T$  topics while the inequality above contains  $T + 1$  elements, there are at least two elements which are identical; thus, we obtain a contradiction. We conclude that an improvement cycle can not exist. The above suggests that every better-response dynamics must converge. □

## C Proof of Theorem 2

In this section, we construct the exponential improvement path stated in Theorem 2 and exemplified in its proof sketch. We first construct the game formally for every  $\mathcal{P}$  and  $\mathcal{T}$ . Second, we define the path recursively via Algorithm 2, and exemplify it using a simple game. Third, we demonstrate several properties of the constructed path, among them its exponential length.

$$\begin{pmatrix} c & 2c & 3c & 4c & 5c & 6c & 7c \\ c & 13c & 12c & 11c & 10c & 9c & 8c \\ c & 14c & 15c & 16c & 17c & 18c & 19c \\ c & 25c & 24c & 23c & 22c & 21c & 20c \\ c & 26c & 27c & 28c & 29c & 30c & 31c \end{pmatrix}$$

Figure 3: Illustration of the quality matrix for  $P = 5$  players and  $T = 7$  topics.

---

**Algorithm 2:** Constructing Exponential Better-Response Dynamics

---

```

1  $\mathbf{a} \leftarrow (1, \dots, 1)$  // initial profile, exists globally and is accessed by Recurse
2  $p \leftarrow P$ 
3  $S \leftarrow \mathcal{T} \setminus \{1\}$  //  $S$  is the list of all non-tie topics
4 Recurse( $p, S$ )
   procedure Recurse( $p, S$ ):
5     if  $p == 1$  then
6         /* The base case concerns with player 1 only. */
7         while  $S \neq \emptyset$  do
8              $a_1 \leftarrow \min(S)$  // Player 1 advances
9              $S.remove(\min(S))$ 
10        return
11    while  $S \neq \emptyset$  do
12        execute Recurse( $p - 1, S$ ) // See Proposition 6 for the intermediate profile
13        if  $p$  is even then
14             $a_p \leftarrow \max(S)$  // Player  $p$  dislodges
15             $S.remove(\max(S))$ 
16        else if  $p$  is odd then
17             $a_p \leftarrow \min(S)$  // Player  $p$  dislodges
18             $S.remove(\min(S))$ 
19         $a_{p-1} \leftarrow 1$  // Player  $p - 1$  withdraws
20    return

```

---

### C.1 Game Construction

Let  $P$  and  $T$  denote  $|\mathcal{P}|$  and  $|\mathcal{T}|$ , respectively. Let  $c = \frac{1}{PT}$ , and consider the quality matrix  $\mathcal{Q}$  such that

$$\mathcal{Q}_{j,k} = \begin{cases} c & \text{if } k = 1 \\ c \cdot (2(T-1) \binom{j-1}{2} + k) & \text{if } k > 1 \text{ and odd } j \\ c \cdot (2T+1-k+2(T-1) \binom{j}{2} - 1) & \text{if } k > 1 \text{ and even } j \end{cases} \quad (20)$$

Despite the involved definition,  $\mathcal{Q}$  has a simple structure; see Figure 3 for illustration. Notice that all players have the same quality w.r.t. topic 1. Moreover, the rest of the qualities (of topics 2 to  $T$ ) follow a snake-shape increment. A structural property of this increment is dominance: Every player  $j$  for  $1 < j \leq T$  is better than player  $j - 1$  on all topics but topic 1.<sup>9</sup>

We define the conversion matrix  $\mathcal{C}$  to be identical to  $\mathcal{Q}$ ,  $\mathcal{C} = \mathcal{Q}$  (the action-target utility of Ben-Porat et al. [9]). To conclude the game description, let  $\mathcal{D}$  be the uniform distribution over  $\mathcal{T}$ , i.e.,  $\mathcal{D}(k) = \frac{1}{T}$  for every  $k \in \mathcal{T}$ . In the next subsection, we construct an exponentially long path in the game  $\langle \mathcal{P}, \mathcal{T}, \mathcal{D}, \mathcal{Q}, \mathcal{C} \rangle$ .

## C.2 Recursive Path

We define the path recursively over the players and the topics via the procedure `Recurse`, which is detailed in Algorithm 2. We first describe the course of the algorithm and the way `Recurse` operations, and then illustrate it using the example from Subsection 3.2.

In Line 1 we set up the initial profile, which is  $(1, 1, \dots, 1)$ . Under this profile, every player gets the same share of the user mass on topic 1, namely  $\frac{c}{PT}$ . In Line 2 we assign to  $p$  the number of players that are still unmatched. In Line 3 we initialize the  $S$  to include all the topics but topic 1. Recall that topic 1 is singular, as the qualities of all players are a like. In Line 4 we call the `Recurse` procedure, which is the heart of the construction. Implied by its name `Recurse`. It gets the number of players  $p$  and a set of topics  $S \subseteq \mathcal{T} \setminus \{1\}$ , and makes recursive calls. Every recursive call only concerns with players  $1, \dots, p$  and the topics  $S \cup \{1\}$ . We now briefly describe the course of its execution, and later elaborate on the path it induces.

Lines 5-9 are devoted for the base case, where  $p = 1$ . In such a case, player 1 iterates through the topics in  $S$  in increasing order; she deviates to topic  $\min(S)$ , then this topic is removed from  $S$ , and the while loop in Line 6 continues. When there are no more topics in  $S$ , the call returns (Line 9).

Otherwise, if  $p \geq 2$ , we enter the while loop in Line 10. Line 11 includes a recursive call to `Recurse`( $p - 1, S$ ); this is the only place recursive calls are executed. We then continue according to the parity of  $p$ . If  $p$  is even, we enter the if clause in Line 12. Player  $p$  deviates to topic  $\max(S)$  (Line 13), and then  $\max(S)$  is removed from  $S$  (Line 14). Alternatively, if  $p$  is odd, we enter the else clause in Line 15. In this case, Player  $p$  deviates to topic  $\min(S)$  (Line 16), and  $\min(S)$  is removed from  $S$  (Line 17). The final step of the while loop is the deviation of player  $p - 1$  to topic 1, in Line 18. When  $S$  contains no more topics, the call returns (Line 19).

Having explained the dry details of the procedure, we now get into the crux of `Recurse`( $p, S$ ) and the BRD that it forms. When  $p$  and  $S$  are clear from the contexts, it will be useful to discuss the *partial strategy profile*, addressing players  $1, \dots, p$  only. It is almost straightforward to see that

**Observation 2.** *During the course of `Recurse`( $p, S$ ) with  $p < P$ , no player  $j$  with  $j > p$  plays a topic from  $S$ .*

Due to this observation, whenever a player deviate to topic different than 1 inside a recursive call, we know that we can neglect players with index higher than  $p$  while calculating her utility. To use the recursive construction, we wish to characterize how the partial strategy profile looks like after every call. We will later prove that

**Proposition 6.** *The call `Recurse`( $p, S$ ) terminates in the partial strategy profile  $\alpha_{p,S}^{\text{even}} \stackrel{\text{def}}{=} (1, 1, \dots, 1, \min(S))$  if  $p$  is even, and  $\alpha_{p,S}^{\text{odd}} \stackrel{\text{def}}{=} (1, 1, \dots, 1, \max(S))$  if  $p$  is odd.*

In words, the call `Recurse`( $p, S$ ) terminates when all the players  $1, 2, \dots, p - 1$  are playing topic 1, while player  $p$  plays his best topic from  $S$ : Either topic  $\min(S)$  or  $\max(S)$ , depending on her index parity. To illustrate, consider the call the quality matrix in Figure 3 and the call `Recurse`(4, {2, 3, 4, 5}). Since  $p = 4$  is even, by the end of this call the partial strategy profile for players 1 to 4 is  $(1, 1, 1, 2)$ ,

Next, we focus on the deviations. Throughout its execution, players deviate using the “gets” operator,  $\leftarrow$ , (Lines 7, 13, 16 and 18). Those deviations are always w.r.t. the strategy profile globally defined in Line 1. We prove later that those deviations are in fact improvement steps.

**Proposition 7.** *Throughout the course of `Recurse`( $p, S$ ), every time a player deviates the deviation is beneficial.*

To simplify the explanation of the procedure, we divide all deviation into three types:

1. *advance* (Line 7): This improvement step is part of the base case, for  $p = 1$ . Player 1, and only player 1, deviates to the minimal topic in  $S$ .
2. *dislodge* (Line 13 for even  $p$  and 16 for odd  $p$ ): We explain the case for even  $p$ , and the odd case is similar. After executing `Recurse`( $p - 1, S$ ) in Line 11, the partial strategy profile of

<sup>9</sup>In fact, any monotonically increasing values along the snake (top-down) will suffice; these are selected for readability.

| Step | Executing call           | Advance                          | Dislodge | Withdraw |
|------|--------------------------|----------------------------------|----------|----------|
| 1    | Recurse(1, {2, 3, 4, 5}) | →(2,1,1)→(3,1,1)→(4,1,1)→(5,1,1) |          |          |
| 2    | Recurse(2, {2, 3, 4, 5}) |                                  | →(5,5,1) | →(1,5,1) |
| 3    | Recurse(1, {2, 3, 4})    | →(2,5,1)→(3,5,1)→(4,5,1)         |          |          |
| 4    | Recurse(2, {2, 3, 4})    |                                  | →(4,4,1) | →(1,4,1) |
| 5    | Recurse(1, {2, 3})       | →(2,4,1)→(3,4,1)                 |          |          |
| 6    | Recurse(2, {2, 3})       |                                  | →(3,3,1) | →(1,3,1) |
| 7    | Recurse(1, {2})          | →(2,3,1)                         |          |          |
| 8    | Recurse(2, {2})          |                                  | →(2,2,1) | →(1,2,1) |
| 9    | Recurse(3, {2, 3, 4, 5}) |                                  | →(1,2,2) | →(1,1,2) |
| 10   | Recurse(1, {3, 4, 5})    | →(3,1,2)→(4,1,2)→(5,1,2)         |          |          |
| 11   | Recurse(2, {3, 4, 5})    |                                  | →(5,5,2) | →(1,5,2) |
| 12   | Recurse(1, {3, 4})       | →(3,5,2)→(4,5,2)                 |          |          |
| 13   | Recurse(2, {3, 4})       |                                  | →(4,4,2) | →(1,4,2) |
| 14   | Recurse(1, {3})          | →(3,4,2)                         |          |          |
| 15   | Recurse(2, {3})          |                                  | →(3,3,2) | →(1,3,2) |
| 16   | Recurse(3, {3, 4, 5})    |                                  | →(1,3,3) | →(1,1,3) |
| 17   | Recurse(1, {4, 5})       | →(4,1,3)→(5,1,3)                 |          |          |
| 18   | Recurse(2, {4, 5})       |                                  | →(5,5,3) | →(1,5,3) |
| 19   | Recurse(1, {4})          | →(4,5,3)                         |          |          |
| 20   | Recurse(2, {4})          |                                  | →(4,4,3) | →(1,4,3) |
| 21   | Recurse(3, {4, 5})       |                                  | →(1,4,4) | →(1,1,4) |
| 22   | Recurse(1, {5})          | →(5,1,4)                         |          |          |
| 23   | Recurse(2, {5})          |                                  | →(5,5,4) | →(1,5,4) |
| 24   | Recurse(3, {5})          |                                  | →(1,5,5) | →(1,1,5) |

Figure 4: A long improvement path for the illustration in Subsection C.2

players  $1, 2, \dots, p-1$  is  $a_{p-1,S}^{\text{odd}}$ . Indeed, this is true due to Proposition 6 and  $p-1$  being odd. In particular, player  $p-1$  plays  $\max(S)$ . When we reach Line 13, player  $p$  deviates to  $\max(S)$  as well. Recall that by the construction of  $\mathcal{Q}$ , player  $p$ 's quality dominates the quality of player  $p-1$  on every topic excluding 1. Consequently, since every topic in  $\mathcal{S}$  is always greater than 1, the utility of player  $p-1$  zeros. More pictorially, player  $p$  *dislodges* player  $p-1$  from being the highest-quality author on topic  $\max(S)$ .

3. *withdraw* (Line 18): Player  $p-1$  *withdraw* from writing on a favorable topic (the one she was just dislodged from in Line 13), and deviates to topic 1.

To illustrate the terminology and the path, we return to example proposed in Subsection 3.2, and iterate through the path that the procedure forms. In Figure 4 we give the improvements and the call that executes them.

### C.3 Proofs from Subsection C.2

**Proof of Observation 2.** We prove the claim by induction on the depth of the call stack. If  $P = 1$ , then the claim holds trivially. To see that the claim holds for  $P > 1$ , focus on the first call,  $\text{Recurse}(P, \mathcal{T} \setminus \{1\})$ . Recall that the starting profile is  $(1, 1, \dots, 1)$ . Since  $P > 1$ , the procedure enters the while loop in Line 10. Then, the call to  $\text{Recurse}(P-1, \mathcal{T})$  is executed (Line 11). W.l.o.g. assume  $P$  is even (similarly otherwise), and hence we enter the if condition in Line 12. Player  $P$  deviates to  $\max(S)$  and dislodges player  $P-1$ , and then  $\max(S)$  is removed from  $S$ . Later, in Line 18, player  $P-1$  withdraws to topic 1. In the next iteration of the while loop in Line 10,  $S$  do

not contain  $a_P$ . This reasoning can be applied for every iteration of the while loop during the call  $\text{Recurse}(P, \mathcal{T})$ .

Assume the claim holds for player  $J + 1$  and  $S \subseteq \mathcal{T}$ , and focus on  $\text{Recurse}(j, S)$  for  $j > p$ . By the inductive step, we know that players  $j + 1, \dots, P$  do not play the topics in  $S$ . To finalize the proof, we use the same arguments as before to show that  $\text{Recurse}(j, S)$  only makes calls with  $a_j \notin S$ .  $\square$

**Proof of Proposition 6.** The key ingredient of this proof is to watch the snake-trail closely (see the definition of  $\mathcal{Q}$  and Figure 3).

We prove the claim by induction on  $p$ . First, notice that  $S$  is non-empty, because recursive calls can only happen in Line 11, which means the while expression,  $S \neq \emptyset$  is true.

The base case is when  $p$  equals 1. We enter the if statement in Line 5, and each iteration player 1 *advances* to topic  $\min(S)$ . By the end of the loop, the only topic still in  $S$  is  $\max(S)$ , player 1 *advances* to  $\max(S)$ , which is then removed. We are hence guaranteed that at the return command in Line 9, the partial strategy profile for player 1 is  $(\max(S))$ .

Consider an even  $p$  and the call  $\text{Recurse}(p, S)$ , and assume the claim holds for  $p - 1$ , which is odd. To avoid notational confusion, we will denote by  $S'$  the set  $S$  at the beginning of the call, and let  $S$  change through the course of the call. Therefore, we essentially analyze  $\text{Recurse}(p, S')$ .

Due to the inductive assumption, every time the recursive call to  $\text{Recurse}(p - 1, S)$  for the appropriate subset  $S$  returns, the partial strategy profile for players  $1, 2, \dots, p - 1$  is  $(1, 1, \dots, 1, \max(S))$ . Player  $p$  then dislodges player  $p - 1$  from  $\max(S)$  (Line 13),  $\max(S)$  is removed from  $S$  and player  $p - 1$  withdraws to topic 1 (Line 18). Consequently, by the end last iteration of the while loop in Lines 10, player  $p$  dislodges player  $p - 1$  from  $\min(S')$  (Since  $|S| = 1$  and all other topics were removed), the last topic is removed from  $S$ , and player  $p - 1$  withdraws to topic 1; hence, the partial strategy profile for players  $1, 2, \dots, p$  at the end of this call is  $(1, 1, \dots, 1, \min(S'))$  (with  $a_{p-1} = 1$  and  $a_p = \min(S')$ ).

Next, consider an odd  $p$  and the call  $\text{Recurse}(p, S)$ , and assume the claim holds for  $p - 1$ , which is even. We follow the same notation convenience as before, and analyze  $\text{Recurse}(p, S')$ .

The arguments are almost identical to the even case, but appear here for completeness. Due to the inductive assumption, every time the recursive call to  $\text{Recurse}(p - 1, S)$  for the appropriate subset  $S$  returns, the partial strategy profile for players  $1, 2, \dots, p - 1$  is  $(1, 1, \dots, 1, \min(S))$ . Player  $p$  then dislodges player  $p - 1$  from  $\min(S)$  (Line 16),  $\min(S)$  is removed from  $S$  and player  $p - 1$  withdraws to topic 1 (Line 18). Consequently, by the end last iteration of the while loop in Lines 10, player  $p$  dislodges player  $p - 1$  from  $\max(S')$  (Since  $|S| = 1$  and all other topics were removed), the last topic is removed from  $S$ , and player  $p - 1$  withdraws to topic 1; hence, the partial strategy profile for players  $1, 2, \dots, p$  at the end of this call is  $(1, 1, \dots, 1, \max(S'))$  (with  $a_{p-1} = 1$  and  $a_p = \max(S')$ ).

This completes the proof of the proposition.  $\square$

**Proof of Proposition 7.** We prove the claim by addressing each type of deviation separately.

1. *advance*: (Line 7): Consider the call  $\text{Recurse}(1, S)$  for some  $S$ . Due to Proposition 6, the partial profile of player 1 at the beginning of the iteration is  $(1)$ , namely  $a_1 = 1$ . Due to Observation 2, no other player plays  $\min(S)$ , and thus this is a beneficial deviation. Since player 1 advances along the snake-trail in the while loop in Line 6, her deviations are beneficial.
2. *dislodge*: W.l.o.g. consider an even  $p$  (Line 13, the odd case is almost identical and hence omitted). Due to Proposition 6, the partial profile of players  $1, 2, \dots, p$  at the beginning of the iteration is  $(1, 1, \dots, 1)$ . During the course of the execution, player  $p$  deviates only using dislodge operations. In the first iteration of the while loop, player  $p$  deviates from topic 1 to topic  $\max(S)$ . Recall that Observation 2 guarantees that no other player with greater index player  $\max(S)$ ; hence, due to the construction of  $\mathcal{Q}$  in Equation (20), she improves her utility from at most  $c$  to a strictly greater utility. Afterwards, in every iteration of the while loop, she follows the snake-trail and thus her deviations are beneficial.

3. *withdraw*: (Line 18): We address the case of even  $p$ , and the odd case follows similarly. After every recursive call the  $\text{Recurse}(p-1, S)$ , the obtain partial strategy profile is  $(1, 1, \dots, 1, \max(S))$  (partial for players  $1, 2, \dots, p-1$ ). Recall that player  $p$  dislodges player  $p-1$  from her topic, since by the construction of  $\mathcal{Q}$ , player  $p$ 's quality dominates the quality of player  $p-1$  on every topic excluding 1. Consequently, the utility of player  $p-1$  zeros. When player  $p-1$  withdraws to topic 1, she gets a strictly positive utility as all the players are of equal quality w.r.t. this topic.

Overall, we have showed that all deviations are beneficial.  $\square$

#### C.4 Path Length

We now lower bound the length of the BRD  $\text{Recurse}$  generates. Let  $f(P, s)$  denote the number of profiles  $\text{Recurse}(P, S)$  iterates (for  $s = |S|$ ). According to the base case (Lines 5-9), if  $p = 1$  then  $f(1, s) = s$ . Furthermore, for completeness, we note that if  $s = 0$  then  $f(p, 0) = 0$ .

For  $p, s$  such that  $p > 1$  and  $s \geq 1$ , the analysis should incorporate the deviations in the while loop (Line 10). Every iteration includes a recursive call to  $\text{Recurse}(p-1, S')$ , were  $|S'|$  goes from  $s$  to 1 inclusive, and *dislodge* and *withdraw* steps. As a result,

$$f(p, s) = 2s + \sum_{k=1}^s f(p-1, k).$$

Put differently,

$$f(p, s) - f(p, s-1) = 2s + \sum_{k=1}^s f(p-1, k) - 2(s-1) - \sum_{k=1}^{s-1} f(p-1, k) = 2 + f(p-1, s);$$

therefore,

$$f(p, s) = f(p, s-1) + f(p-1, s) + 2.$$

One can solve this recurrence using generating functions, but here we show a much simpler solution. Let  $F(p, s)$  denote the *multiset coefficient*<sup>10</sup>, i.e.,  $F(p, s) \stackrel{\text{def}}{=} \binom{s}{p} = \binom{p+s-1}{p}$ . Next, we show that  $f(p, s) \geq F(p, s)$ . This inequality holds as equality for the base cases  $(1, s)$  for  $s \geq 0$  and  $(p, 0)$  for  $p \geq 0$ . Assume that the  $f(p', s') \geq F(p', s')$  whenever either  $p' < p$  or  $s' < s$ . It holds that

$$\begin{aligned} f(p, s) &= f(p, s-1) + f(p-1, s) + 2 \\ &\geq F(p, s-1) + F(p-1, s) + 2 \\ &= \binom{p+s-2}{p} + \binom{p+s-2}{p-1} + 2. \\ &= \binom{p+s-1}{p} + 2. \\ &= \binom{s}{p} + 2. \\ &= F(p, s) + 2, \end{aligned}$$

where we use the inductive step and Pascal's triangle; thus,  $f(p, s) \geq F(p, s)$  holds. Recall that the initial call (Line 4) is  $\text{Recurse}(|\mathcal{P}|, \mathcal{T} \setminus \{1\})$ ; therefore, the number of steps is in this call is  $f(P, T-1)$ . Using the relation between  $f$  and  $F$ ,

$$f(P, T-1) \geq F(P, T-1) = \binom{T-1}{P} = \binom{P+T-2}{P} \geq \left(\frac{T-2}{P} + 1\right)^P.$$

This concludes the proof of Theorem 2 and this section.

<sup>10</sup>[https://en.wikipedia.org/wiki/Binomial\\_coefficient#Multiset\\_\(rising\)\\_binomial\\_coefficient](https://en.wikipedia.org/wiki/Binomial_coefficient#Multiset_(rising)_binomial_coefficient).

## D Proofs from Section 4

### D.1 Proof of Theorem 3

Before we begin, we make the following notational remarks. When referring to the value of any object used in Algorithm 1, we use the super script  $t:e$  to denote the value of that object at the end of the  $t$ 'th iteration, and  $t:b$  to denote the value of that object at the beginning of the  $t$ 'th iteration. For instance,  $A_k^{t:b}$  or  $k^{*t:e}$ . In addition, we denote by  $\alpha^t$  the value of the maximum in Line 8 in iteration  $t$ , i.e.,

$$\alpha^t = \max_{j \in A_{k^{*t:e}}^{t:e}} \frac{\mathcal{D}(k^{*t:e})\mathcal{C}_{j,k^{*t:e}}}{L_{k^{*t:e}}^{t:b} + 1}.$$

The proof of this theorem relies on Propositions 8-10 below; we defer their proofs to Subsection D.2. To claim that the returned profile  $\mathbf{a}^*$  is a PNE, we first need to show that it is a valid strategy profile.

**Proposition 8.** *Algorithm 1 returns a valid strategy profile.*

Next, we claim that  $(\alpha)_{t=1}^P$  is monotone.

**Proposition 9.** *The sequence  $(\alpha)_{t=1}^P$  is monotonically non-increasing.*

The next proposition lower bounds the utility of every player by the appropriate value of  $\alpha$ .

**Proposition 10.** *Let  $j$  be an arbitrary player index and  $t(j)$  be the index of the iteration player  $j$  was matched and removed (Lines 16 and 17). It holds that*

$$\mathcal{U}_j(\mathbf{a}^*) \geq \alpha^{t(j)}.$$

Using the above propositions, the proof of Theorem 3 is almost straightforward. Assume by contradiction that the claim does not hold; namely, there is a player  $j$  and topics  $k, k'$  such that  $a_j = k$  but  $\mathcal{U}_j(\mathbf{a}_{-j}^*, k') > \mathcal{U}_j(\mathbf{a}^*)$ . Let  $t(j)$  denote the iteration when we matched and removed player  $j$ . In addition, notice that  $L_{k'}^{t(j):e}$  denotes the number of players selecting  $k'$  under  $\mathbf{a}^*$ ; thus,  $L_{k'}^{t(j):e} = |H_{k'}(\mathbf{a}^*)|$ . Observe that  $j \in H_k(\mathbf{a}_{-j}^*, k')$ , since otherwise  $\mathcal{U}_j(\mathbf{a}_{-j}^*, k') = 0$ . By invoking Propositions 9 and 10, we get that

$$\mathcal{U}_j(\mathbf{a}^*) \geq \alpha^{t(j)} \geq \frac{\mathcal{D}(k')\mathcal{C}_{j,k'}}{L_{k'}^{t(j):e} + 1} = \frac{\mathcal{D}(k')\mathcal{C}_{j,k'}}{|H_{k'}(\mathbf{a}_{-j}^*, k')|} = \mathcal{U}_j(\mathbf{a}_{-j}^*, k');$$

thus, we obtained a contradiction.

### D.2 Proofs from Subsection D.1

**Proof of Proposition 8.** To prove the proposition, we need to show that every player is matched. Recall that we assume for simplicity that  $P \leq T$  (see Footnote 8), or otherwise we add columns of zero to  $\mathcal{Q}$  and  $\mathcal{C}$  until  $P = T$ .

Every time the algorithm matches players to topics (Line 16), it removes a set of players and a set of topics from the graph (Lines 17 and 19). Clearly, the number of topic copies we remove  $|W|$  equals the number of players we remove,  $|N_G(W)|$ ; thus, in every iteration  $|Y| \leq |\tilde{T}|$ . To complete the argument, notice that as long as there are players in  $Y$  there are topics in  $\mathcal{T}$ , and hence we will continue to pick  $k^*$  (Line 8), add new nodes to  $x$  (Lines 10 and 11), and match them with players in  $Y$ .  $\square$

**Proof of Proposition 9.** The sequence of sets  $(\tilde{\mathcal{T}}^{t:b})_{t=1}^P$  is monotonically non-increasing, since at the beginning  $\tilde{\mathcal{T}}^{1:b} = \mathcal{T}$  and afterwards elements can only be removed (in Line 19). In addition,  $\mathcal{D}(k)$  is fixed for every  $k \in \mathcal{T}$ , and  $(L_k^{t:b})_{t=1}^P$  is monotonically non-decreasing for every  $k \in \mathcal{T}$ . The only tricky part is the conversion  $\mathcal{C}_{j,k}$ . To illustrate, matching and removing a player might decrease the highest quality on topic  $k$ , thereby changing  $A_k$ . This change could potentially increase the conversion of the players in  $A_k$ . However, due to Assumption 1, the conversion of the highest-quality player on a fixed topic is non-increasing as we remove players. As a result, for every  $t, 1 \leq t < P$

$$\alpha^t = \max_{j \in A_k^{t:e}} \frac{\mathcal{D}(k)\mathcal{C}_{j,k}}{L_k^{t:b} + 1} \geq \max_{j \in A_k^{(t+1):e}} \frac{\mathcal{D}(k)\mathcal{C}_{j,k}}{L_k^{t:b} + 1} \geq \max_{j \in A_k^{(t+1):e+1}} \frac{\mathcal{D}(k)\mathcal{C}_{j,k}}{L_k^{(t+1):b} + 1} = \alpha^{t+1}.$$

$\square$



---

**Algorithm 3:** Find saturated set in a bipartite graph

---

**Input:** A bipartite graph  $G = (X \cup Y, E)$  satisfying the marriage condition

**Output:** A maximum saturated set in  $G$

**procedure** GetSaturated( $G$ ):

- 1 find an  $X$ -saturated matching  $M$  in  $G$
  - 2 denote by  $\tilde{Y} \subseteq Y$  the nodes that  $M$  does not match
  - 3 set directions to the edges in  $E$ , such that edges in  $M$  are directed from  $X$  to  $Y$  while the other edges are directed from  $Y$  to  $X$
  - 4 run a BFS starting from the nodes of  $\tilde{Y}$  in the directed graph, traversing each edge only once
  - 5 return the set of nodes in  $X$  that were not discovered during the BFS
- 

**Proof of Proposition 10.** Let  $j$  be an arbitrary player, let  $t(j)$  be the iteration number it was matched and removed, and let  $k$  denote its strategy,  $a_j = k$ . Notice that

$$\mathcal{U}_j(\mathbf{a}^*) = \frac{\mathcal{D}(k)\mathcal{C}_{j,k}}{|H_k(\mathbf{a}^*)|} = \frac{\mathcal{D}(k)\mathcal{C}_{j,k}}{L_k^{t(j):e}} \geq \frac{\mathcal{D}(k^{*t(j)})\mathcal{C}_{j,k^{*t(j)}}}{L_{k^{*t(j)}}^{t(j):b} + 1} = \alpha^{t(j)},$$

where the inequality sign holds due to Proposition 9, and holds as equality if and only if  $k = k^{*t(j)}$ . This concludes the proof of Proposition 10.  $\square$

### D.3 Proof of Lemma 1

We prove the lemma by constructing Algorithm 3 and prove its guarantees. Before we begin, we make the following useful argument.

**Proposition 11.** *Let  $G = (X \cup Y, E)$  be a bipartite graph satisfying the marriage condition. If  $W_1, W_2, \dots, W_k$  are saturated sets, then  $\bigcup_{i=1}^k W_i$  is also a saturated set.*

We defer the proof to Subsection D.4. Proposition 11 suggests that it suffices to find all nodes that participate in *any* saturated set, since their union forms the maximum saturated set. One useful notion in the algorithm and its analysis is that of a *crossing path*.

**Definition 3** ( $M$ -crossing path). *Let  $M$  be an  $X$ -saturating matching in  $G$ . A path  $y, x_1, y_1, \dots, x_k, y_k, x$  between  $y \in Y$  and  $x \in X$  is called an  $M$ -crossing path if for every  $i, 1 \leq i \leq k$  it holds that  $(x_i, y_i) \in M$ .*

Moreover, we leverage the definition of crossing paths to show that

**Proposition 12.** *Let  $M$  be any arbitrary  $X$ -saturating matching in  $G$ , and let  $\tilde{Y}$  denote the nodes in  $Y$  that were not matched. There exists an  $M$ -crossing path from a node  $y \in \tilde{Y}$  to a node  $x \in X$  if and only if  $x$  does not participate in any saturated set in  $G$ .*

We defer the proof to Subsection D.4. We move to describe the details of the procedure GetSaturated, which is given in Algorithm 3. First, in Line 1, we find an  $X$ -saturated matching. Since we are given that  $G$  satisfies the marriage condition, such a matching is guaranteed to exist. To obtain this matching, we can use, e.g., the Hopcroft–Karp algorithm [25]. Then, in Line 2, we denote by  $\tilde{Y}$  the set of nodes that were not matched, all belong to  $Y$ . We then construct a directed version of the graph, such that all paths from  $\tilde{Y}$  are  $M$ -crossing paths (see Definition 3). The final step is to run a BFS to conclude the reachable nodes from  $\mathcal{Y}$ .

The correctness of GetSaturated follows immediately from Proposition 12. As for running time considerations, the heaviest operation in terms of run-time is using the Hopcroft–Karp algorithm in Line 1, which takes  $O(\sqrt{|V|}|E|)$  time. Lines 2-5 can be executed in  $O(|V| + |E|)$  time.

### D.4 Auxiliary Claims for this Section

**Proof of Proposition 11.** We prove the claim for the case of  $k = 2$ , and the general case follows by induction.

First, by applying the marriage condition on  $W_1 \cup W_2$ , we get

$$|W_1 \cup W_2| \leq |N_G(W_1 \cup W_2)|. \quad (21)$$

On the other hand, by applying the marriage condition on  $W_1 \cap W_2$  and using the fact that  $W_1$  and  $W_2$  are saturated, we get

$$|W_1 \cup W_2| = |W_1| + |W_2| - |W_1 \cap W_2| \geq |N_G(W_1)| + |N_G(W_2)| - |N_G(W_1 \cap W_2)|. \quad (22)$$

Due to Proposition 13,  $|N_G(W_1 \cap W_2)| \leq |N_G(W_1) \cap N_G(W_2)|$ ; thus, Inequality (22) implies that

$$|W_1 \cup W_2| \geq |N_G(W_1)| + |N_G(W_2)| - |N_G(W_1) \cap N_G(W_2)| = |N_G(W_1 \cup W_2)|.$$

We get the required result by combining Inequalities (21) and (22).  $\square$

**Proof of Proposition 12.** Denote  $M$  and  $\tilde{Y}$  as in the statement of the proposition.

Direction  $\Rightarrow$ : Assume there exists an  $M$ -crossing path  $y, x_1, y_1, \dots, x_k, y_k, x$  for some  $y \in \tilde{Y}$ , and w.l.o.g. let it be the shortest path. We need to show that for every  $W \subseteq X$  such that  $x \in W$ ,  $|W| < |N_G(W)|$ .

Let  $E'$  denote the edges of that  $M$ -crossing path, when we add the node matched to  $x$ ,  $M(x)$  as the final node. Namely,  $E'$  contains the edges of the path

$$\underbrace{y, x_1}_{\notin M} \underbrace{y_1, x_2}_{\notin M} y_3 \dots x_k \underbrace{y_k, x}_{\notin M} \underbrace{M(x)}_{\in M}$$

Notice that the definition of  $M$ -crossing path does not require anything from edges  $(y_i, x_{i+1})_{i=1}^{k-1}$ . Nevertheless, if  $(y_i, x_{i+1}) \in M$  then  $x_i = x_{i+1}$  must hold, since  $(x_i, y_i) \in M$  and  $M$  matches  $y_i$  only once; but this contradict our assumption that the path is the *shortest*  $M$ -crossing path.

We claim that  $M' = (M \Delta E) \cup E'$  is an  $X$ -saturated matching. Clearly, the degree of every node that does not participate in the edges of  $E'$  was unchanged. Moreover, excluding  $y$  and  $M(x)$ , every node participates in  $E'$  twice: Once via an edge that belongs to  $M$ , and once via an edge that does not; hence, the degree of such nodes in  $M'$  is also 1. The degree of  $y$  is 1 as it is now matched, and the degree of  $M(x)$  is now zero since  $M'$  does not match it to any node.

Notice that  $x$  has at least two neighbors in  $G$ ,  $y$  and  $M(x)$ . Let  $W$  be an arbitrary subset of  $X$  such that  $x \in W$ . It holds that

$$|W| = |M'(W)| < |M'(W)| + |\{M(x)\}| \leq |N_G(W)|.$$

Rearranging, we see that  $|W| < |N_G(W)|$ ; thus,  $W$  is not saturated. Since we selected  $W$  arbitrarily, we proved that  $x$  does not participate in any saturated set.

Direction  $\Leftarrow$ : Assume that there is no  $M$ -crossing path from any node in  $\tilde{Y}$  to  $x$ . We need to show that  $x$  participates in a saturated set.

Let  $W \subset X$  denote the set of nodes reachable via  $M$ -crossing paths from  $\tilde{Y}$ , and let  $\overline{W}$  be its complementary to  $X$ , i.e.,  $\overline{W} = X \setminus W$ . In particular, our assumption implies that  $x \in \overline{W}$ . Observe that  $\tilde{Y}, M(W)$  and  $M(\overline{W})$  is a partition of  $Y$ .

We aim to show that  $N_G(\overline{W}) = M(\overline{W})$ . Indeed, that suffices as by definition of matching,  $|M(\overline{W})| = |\overline{W}|$ . We claim that every node  $y \in N_G(\overline{W})$  must be matched to a node in  $\overline{W}$ . To see way this is true, assume the converse. Let  $x_y$  denote a neighbor of  $y$  in  $\overline{W}$ . If  $y \in \tilde{Y}$ , then  $x_y \in W$  by the way we defined  $W$ . Otherwise,  $y \in M(W)$  (or equivalently,  $M(y) \in W$ ). By definition of  $W$ , there exists a node  $\tilde{y} \in \tilde{Y}$  for which the path

$$\tilde{y}, x_1, y_1, \dots, x_k, y_k, M(y)$$

is an  $M$ -crossing path. Since  $(M(y), y) \in M$ ,

$$\tilde{y}, x_1, y_1, \dots, x_k, y_k, M(y), y, x_y$$

is an  $M$ -crossing path too; however, this is impossible since it would imply that  $x_y \in W$ .  $\square$

**Proposition 13.** Let  $G = (X \cup Y, E)$  be a bipartite graph. For every  $W_1, W_2 \subseteq X$  it holds that

$$N_G(W_1 \cap W_2) \subseteq N_G(W_1) \cap N_G(W_2).$$

**Proof of Proposition 13.** For every  $v \in N_G(W_1 \cap W_2)$  there exists  $u \in W_1 \cap W_2$  such that  $v \in N_G(\{u\})$ . Since  $u \in W_1 \cap W_2$ , it follows that  $v \in N_G(W_1)$  and  $v \in N_G(W_2)$ ; hence,  $v \in N_G(W_1) \cap N_G(W_2)$ .  $\square$

## D.5 Proof of Corollary 1

Recall the Lemma 1 finds a maximum saturated set in  $O(\sqrt{|V||E|})$ , provided that the graph satisfies the marriage condition.

**Proposition 14.** Throughout the course of Algorithm 1, every time Line 13 is executed  $G$  satisfies the marriage condition.

**Proof of Proposition 14.** We prove the claim by induction on the iteration number. The marriage condition holds for  $t = 1$ . At the beginning of the for loop (Line 6), the graph  $G$  is empty; after  $x^1$  is added to  $X$  (Line 11) the only non-empty subset is  $\{x^1\}$ . Notice that according to the way we pick  $k^{*1}$ ,  $x^1$  has at least one neighbor (a player in  $A_{k^{*1}}^1$ , see Line 7); hence,  $|x_1| \leq |N_{G^1}(\{x^1\})| = 1$ .

Assume the claim holds for iterations  $1, \dots, t - 1$ . We distinguish two cases:

1. If a maximum saturated set  $W \neq \emptyset$  was discovered in Line 13 of iteration  $t - 1$ . Due to the inductive step, when executing Line 13  $G$  satisfies the marriage condition. Afterwards, in Lines 15-19 we remove  $W$  and  $N_G(W)$  altogether. As we show in Proposition 11, every union of saturated sets is also saturated; therefore, by the end of the  $t - 1$  for every  $W' \subseteq X$ ,  $|W'| < N_G(W')$ .

From that moment on to the time we reach Line 13 in iteration  $t$ ,  $X$  is added precisely one node,  $x^t$ . As a result  $|W \cup \{x^t\}| \leq |W| + 1 < |N_G(W)| + 1 \leq |N_G(W \cup \{x^t\})| + 1$ , suggesting that  $|W \cup \{x^t\}| \leq |N_G(W)|$ .

2. Otherwise, the algorithm stepped over the if block of Line 14 in the  $t - 1$ 'th iteration, and continued to the  $t$ 'th iteration. In particular, at the beginning of the  $t$ 'th iteration, we have  $|W| < N_G(W)$ . From here on we use exactly the same arguments as in the second part of the previous step.

This completes the proof of the proposition.  $\square$

Due to Proposition 14, we can use the run-time guarantees of Lemma 1 for finding the maximum saturated set. The total run-time of Lines 7 and 8 is  $O(P^{1.5}T)$ , as we can sort every column in  $\mathcal{Q}$  and remove/add rows as we go. The other Lines, 1-5, 9-12, and 14-20 take at most  $O(P + T)$  in every iteration. Finally, notice that for  $G$  it holds that  $\sqrt{|V||E|} \leq \sqrt{P} \cdot T \cdot P$ ; hence, by multiplying it  $P$  times (for every iteration of the for loop in Line 6) we get the desired result.
